# Supplementary material for: The evolution of the temporal program of genome replication
Source: PubMed Central journal article supplement (PMC5989221; doi:10.1038/s41467-018-04628-4), 2018-06-06
Supplement: 41467_2018_4628_MOESM1_ESM.pdf [file 41467_2018_4628_MOESM1_ESM.pdf]

## **Supplementary Figures**

### **The evolution of the temporal program of genome replication**

Agier et al.











**Supplementary Fig. 1:** Replication timing programs in 10 *Lachancea* species. Each plot corresponds to a single chromosome. The *x-axis* represents the chromosomal coordinates in kb and the *y-axis* shows the time in minutes from the release of G1 cells in YPD. Black triangles show the position of the centromere. Grey dots correspond to the Trep calculated in 500 bp non-overlapping windows. The black curve indicates the mean replication times obtained by smoothing the Trep data with a loess regression. Black diamonds on the top of each plot indicate the position of the replication origins.

*L. kluyveri*

$\rho = -0.88$

14 **244** 79

72.4%

*L. cidri*

$\rho = -0.81$

14 **200** 68

70.9%

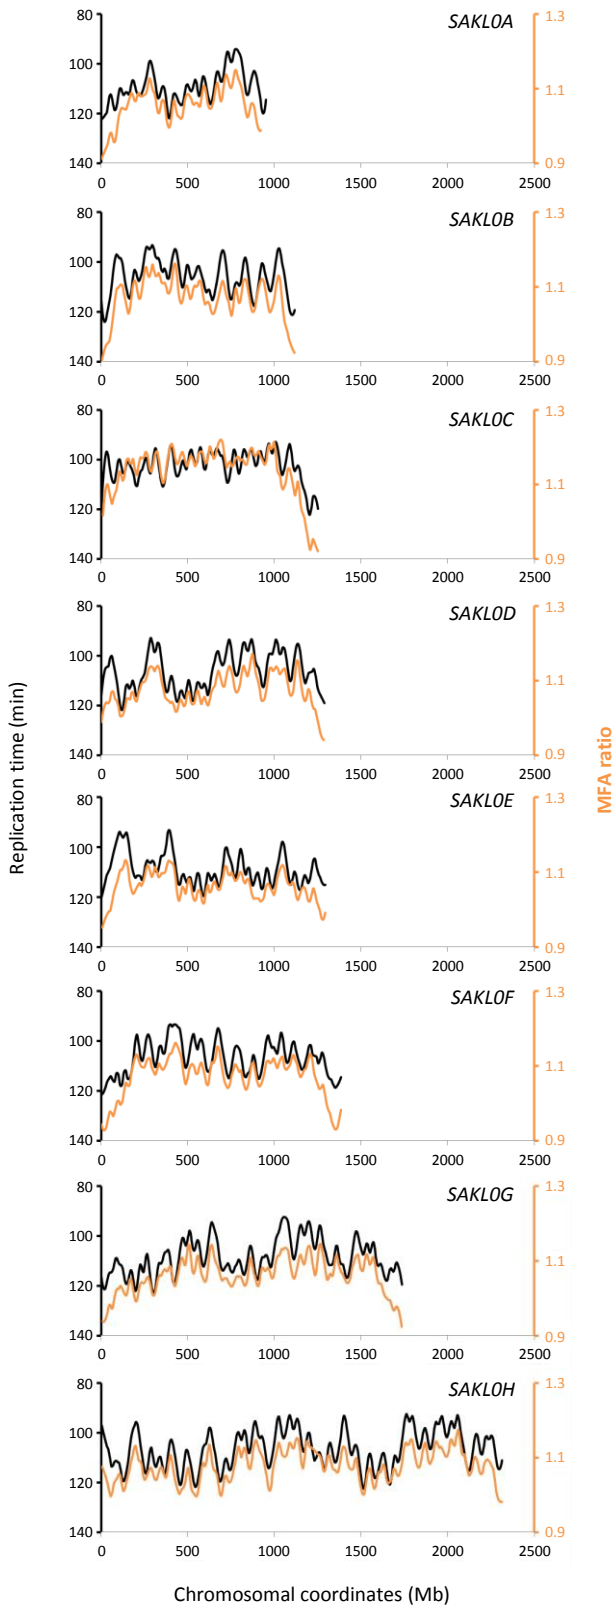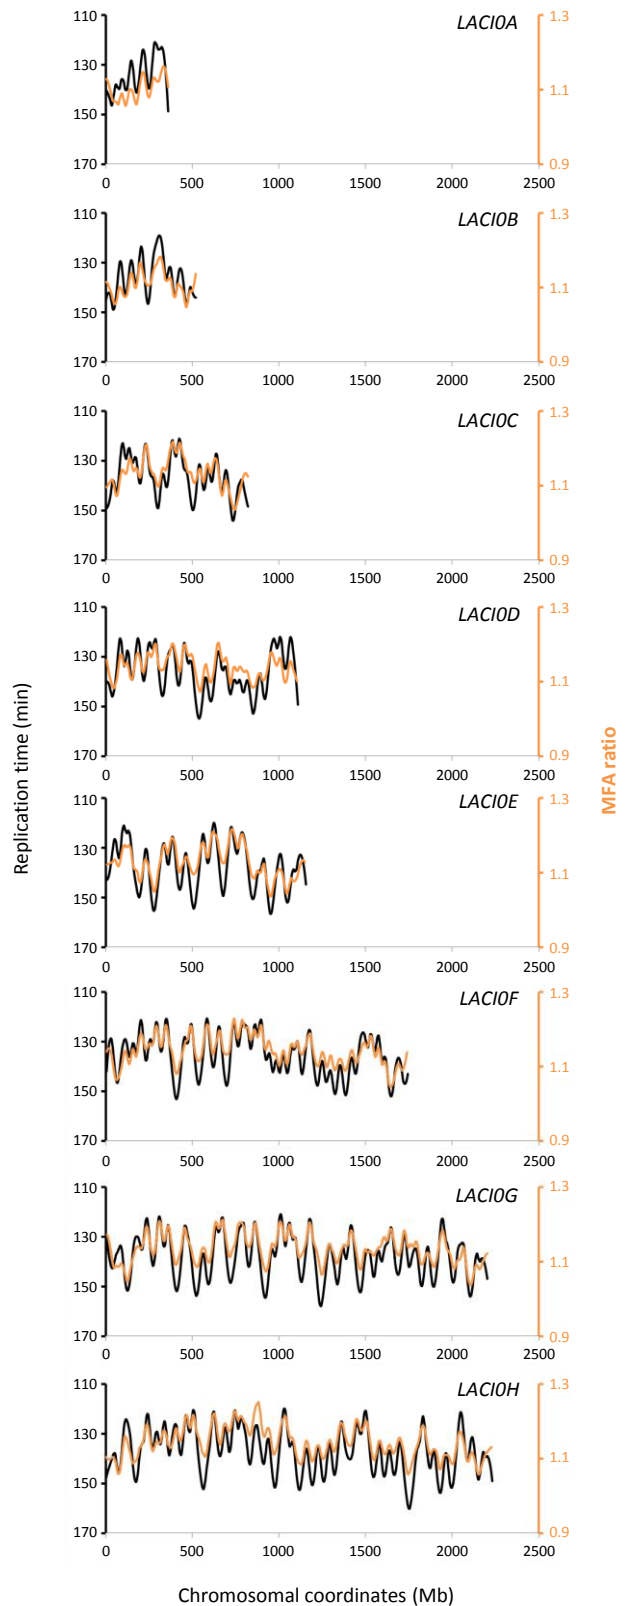



*L. fermentati*

$\rho = -0.93$

16 **214** 40

79.2%

*L. mirantina*

$\rho = -0.90$

26 **202** 66

68.7%

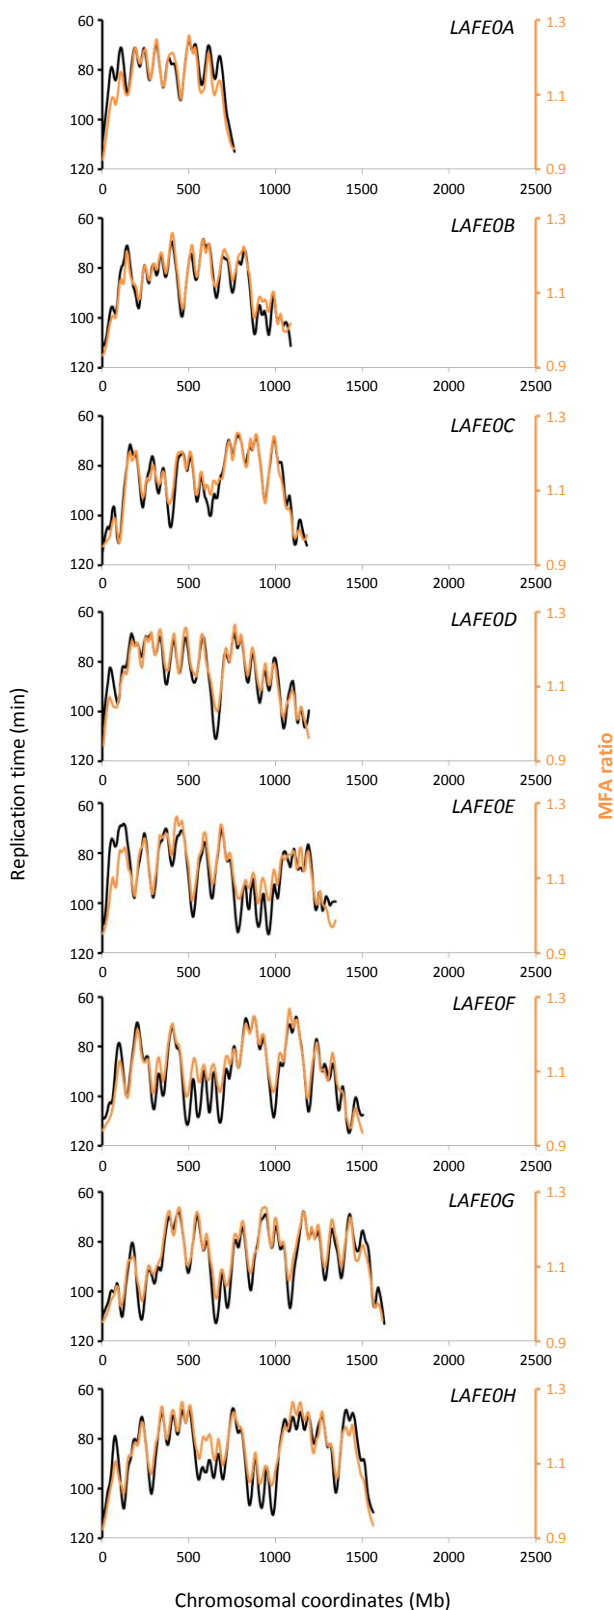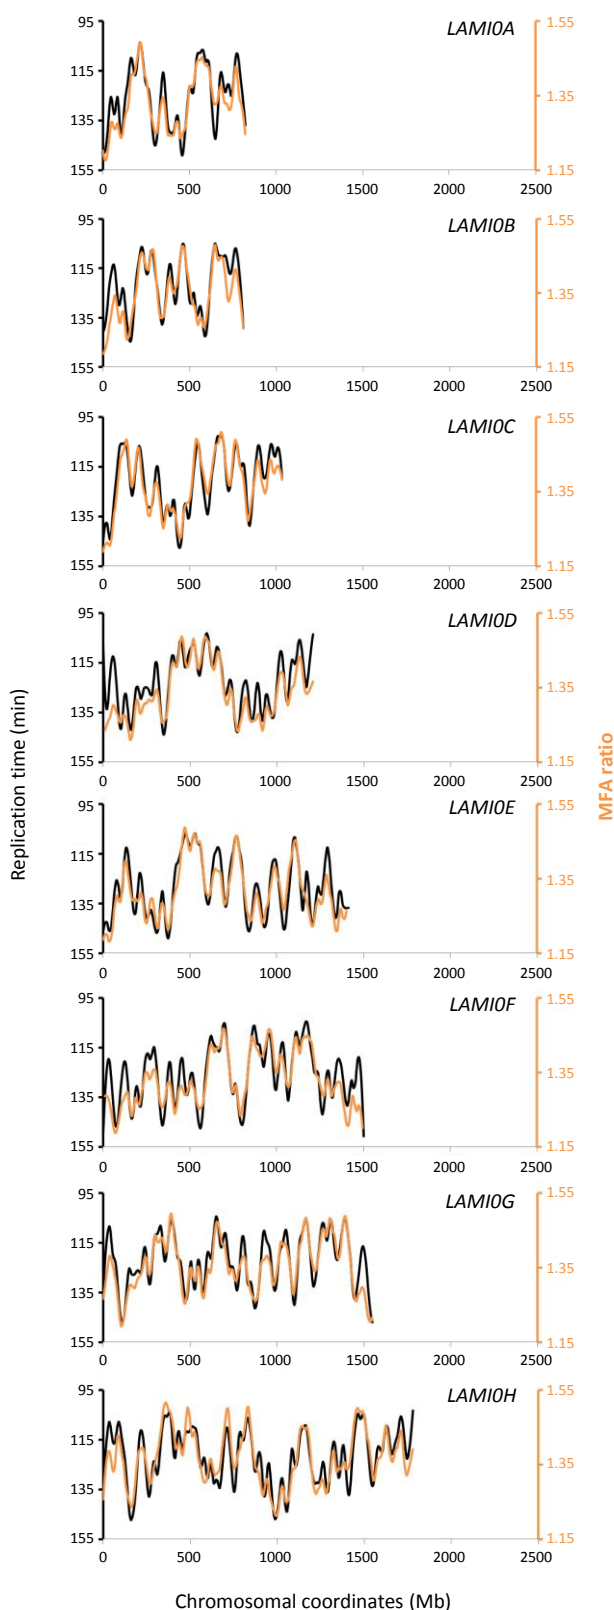

*L. waltii*

$\rho = -0.75$

23 **225** 45

76.8%

*L. thermotolerans*

$\rho = -0.80$

10 **211** 58

75.6%

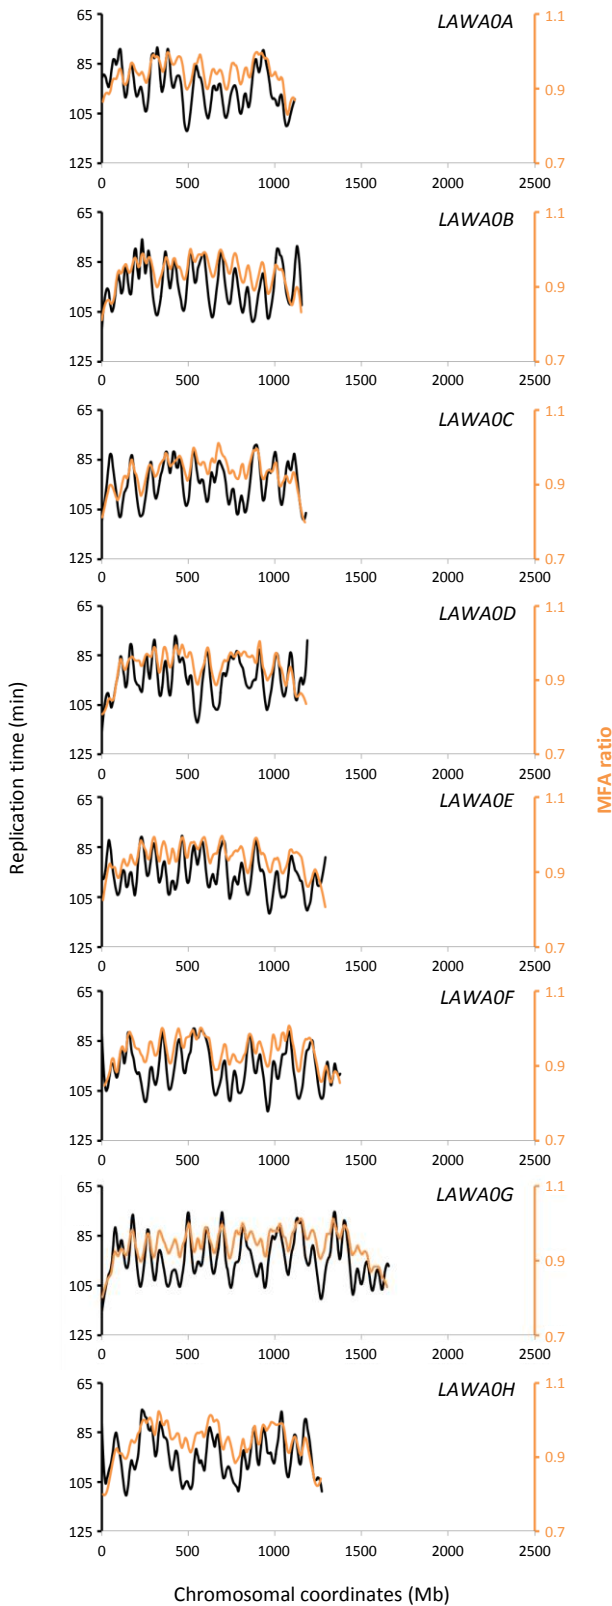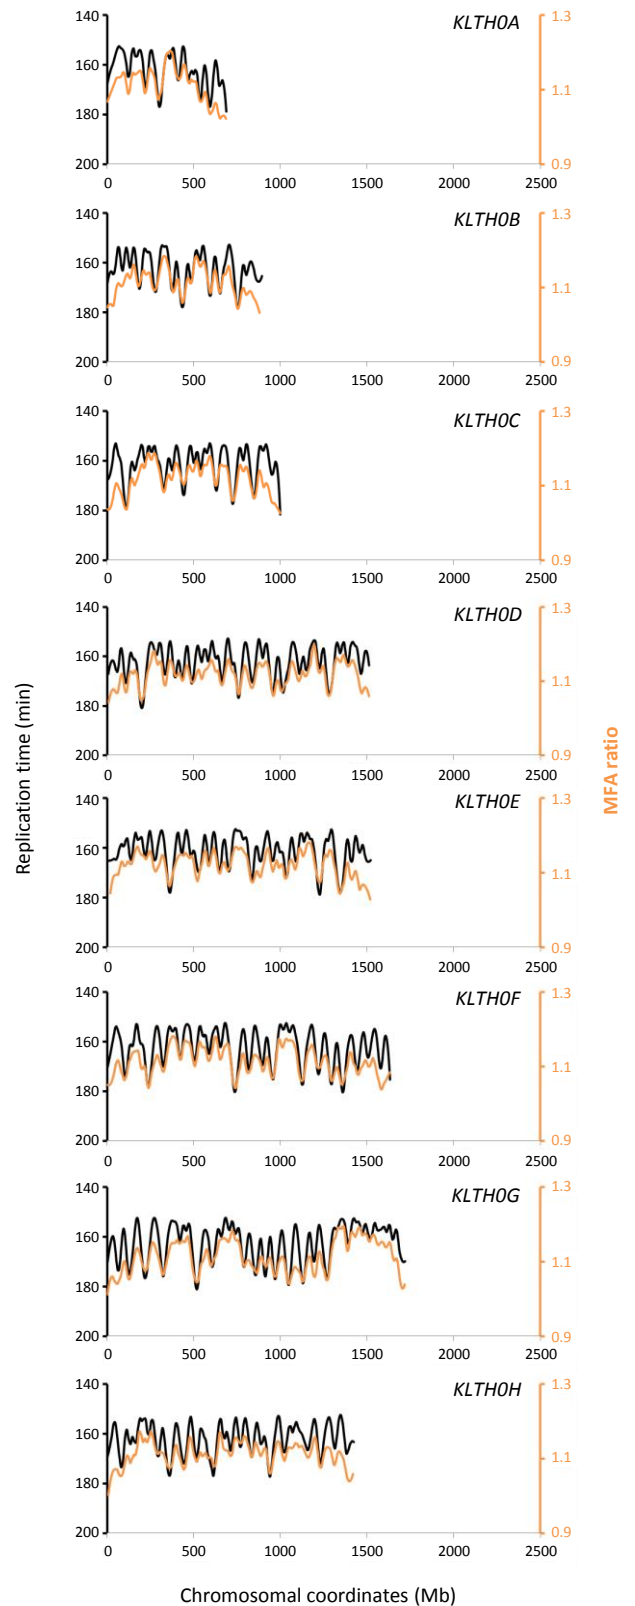

*L. nothofagi*

$\rho = -0.95$

23 **241** 58

74.8%

*L. dasiensis*

$\rho = -0.87$

22 **234** 75

70.6%

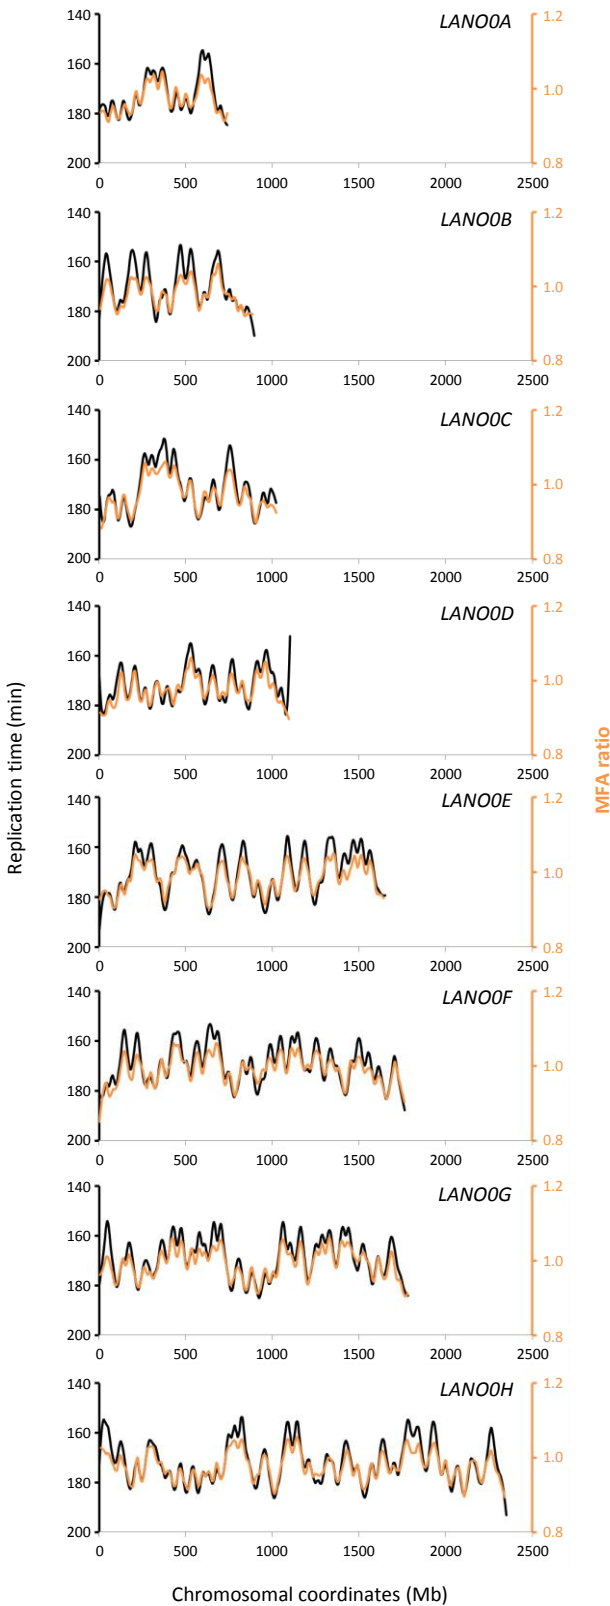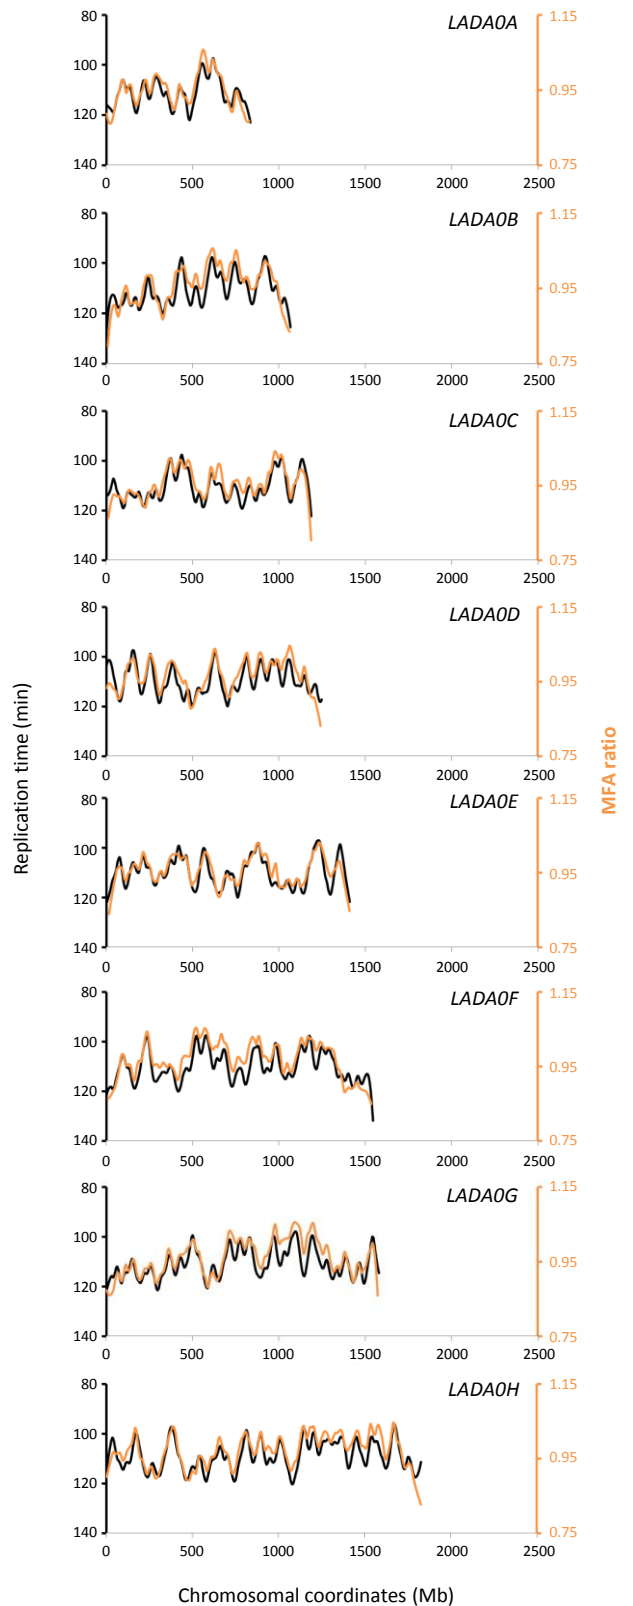

*L. meyersii*

$\rho = -0.61$

28 **237** 87

67.3%

*L. fantastica*

$\rho = -0.78$

66 **256** 33

72.1%

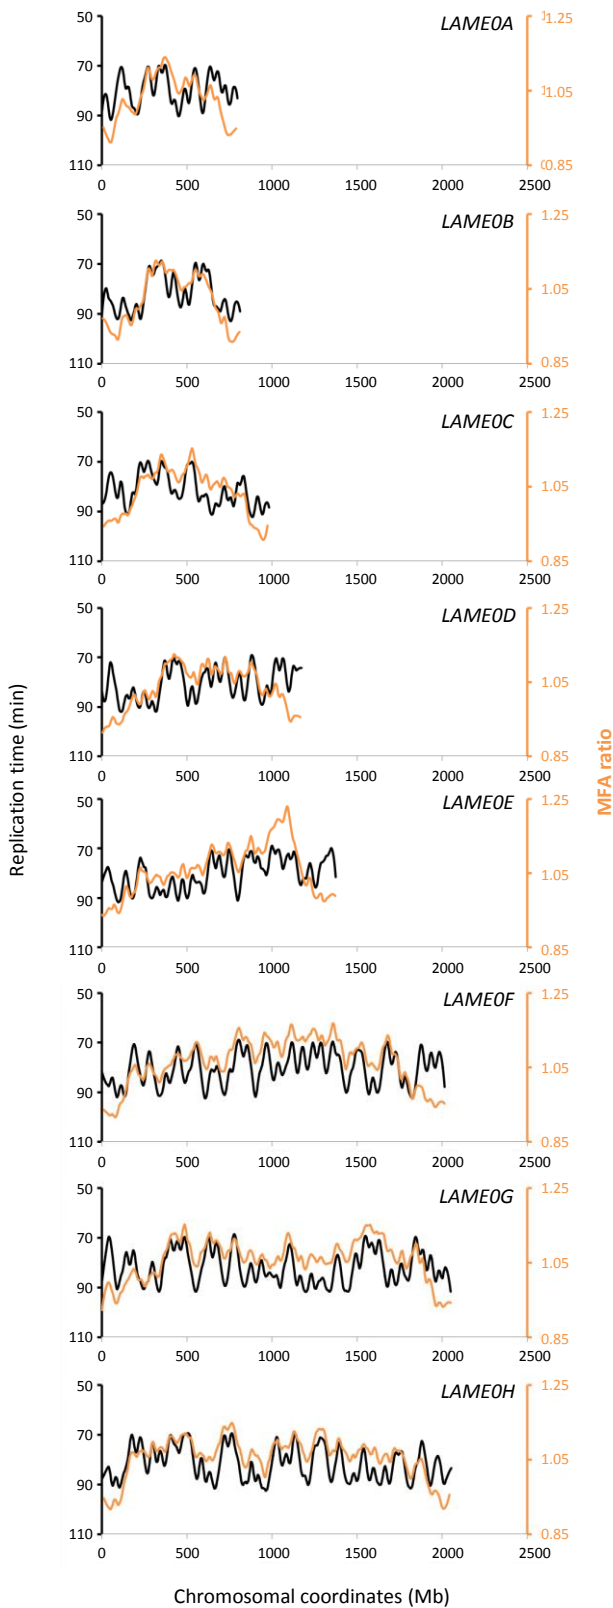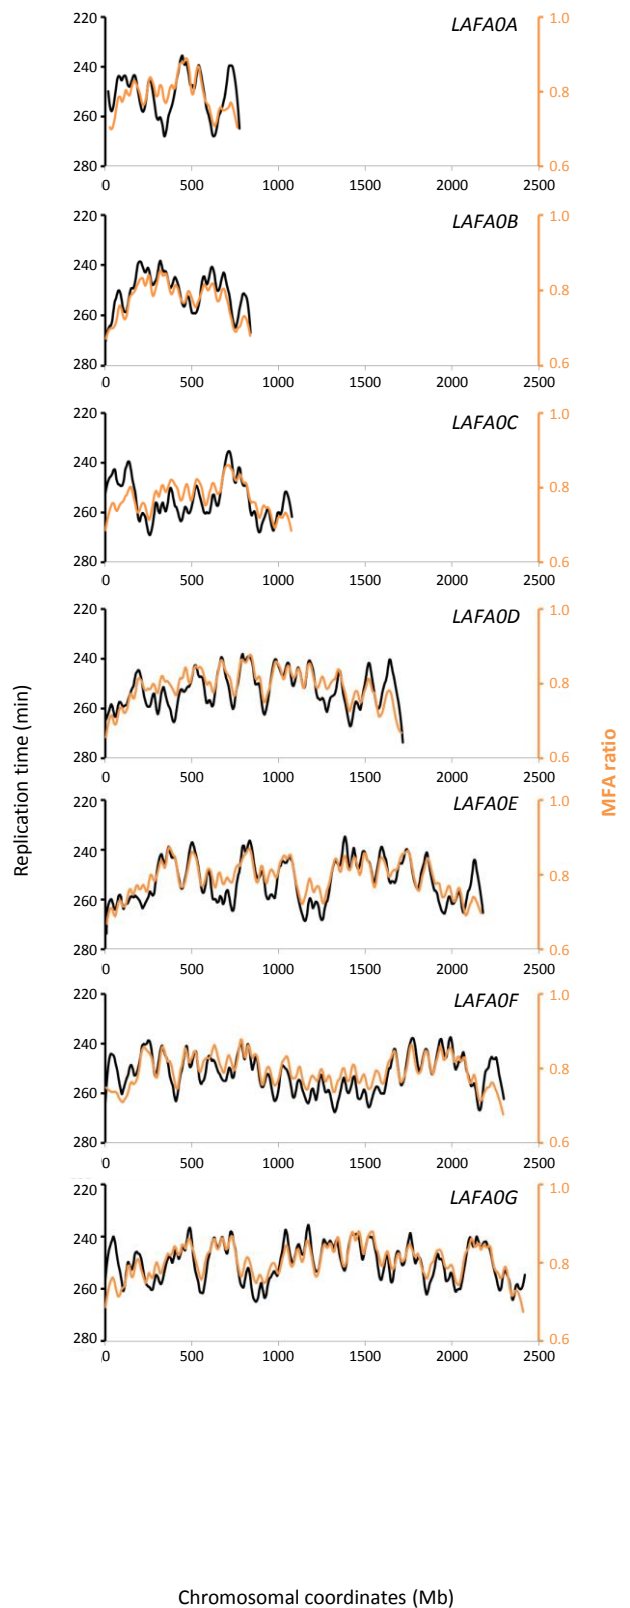

**Supplementary Fig. 2:** Overlay of the mean replication time and the MFA profile in all *Lachancea* species. Each plot shows the mean replication time (black) and MFA profile (orange) for a single chromosome whose name is indicated in the top right of each graph. The Spearman correlation coefficient values ( $\rho$ ) correspond to the genome-wide comparison of the two profiles. The Venn diagrams give the overlap in absolute number and percentage between the two sets of origins identified by each method.

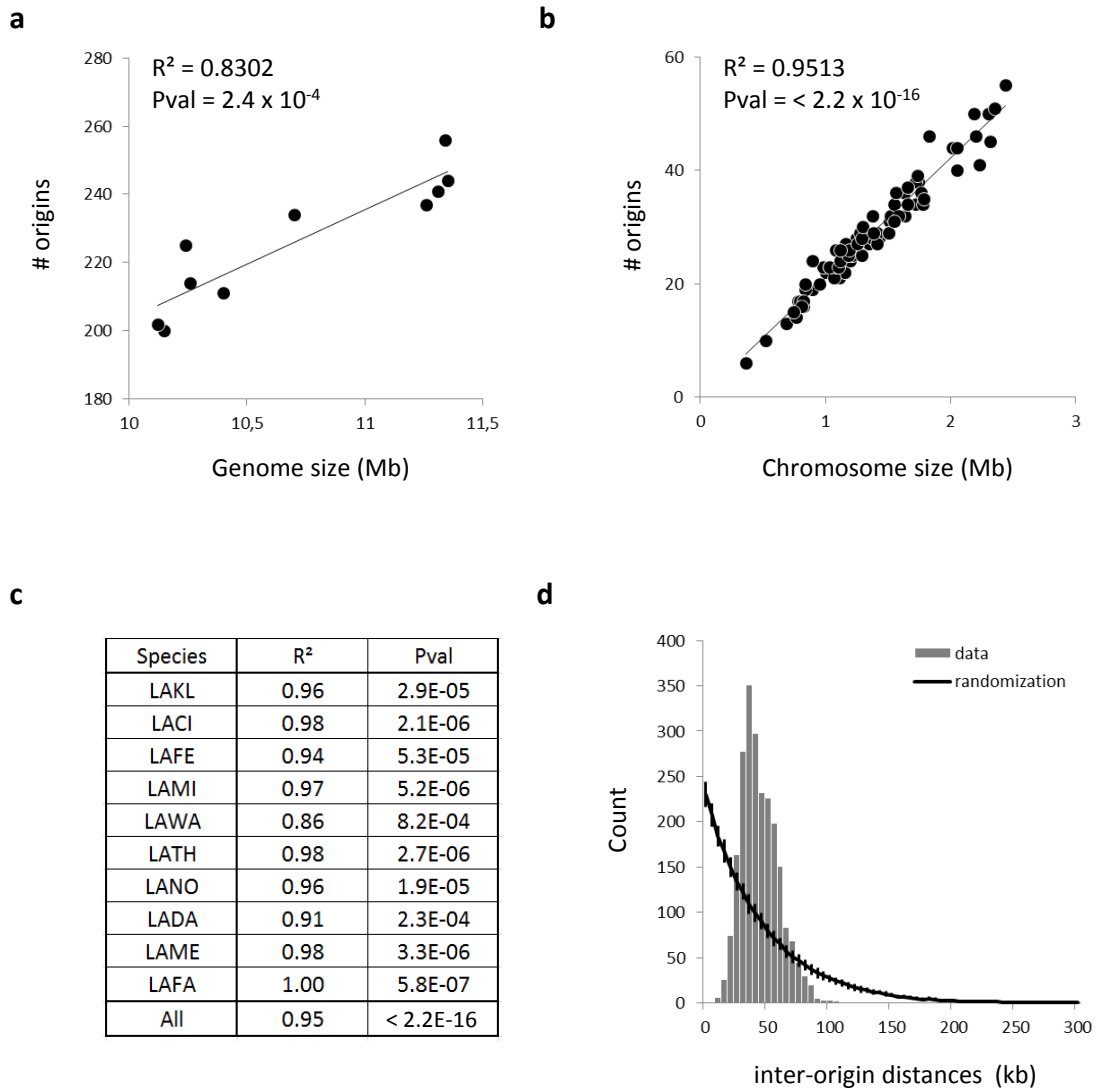

**Supplementary Fig. 3:** Distribution of origins along chromosomes. **a.** Correlation between the number of active replication origins and the genome size. Each dot corresponds to a species. The Pearson correlation coefficient and its associated P-value are indicated. **b.** Correlation between the number of active replication origins and the chromosome size. Each dot corresponds to a single chromosome. The Pearson correlation coefficient and its associated P-value are indicated. **c.** Pearson correlation coefficients and associated P values between the number of active replication origins and the chromosome size for each species. **d.** Comparison between the observed distribution of inter-origin distances (grey histogram) and expected distances if origins were randomly localized (black curve) in the 10 *Lachancea* species. To generate the black curve, origin positions were randomized 100 times in each of the ten *Lachancea* genomes. A similar distribution is also observed for each of the ten species taken individually.

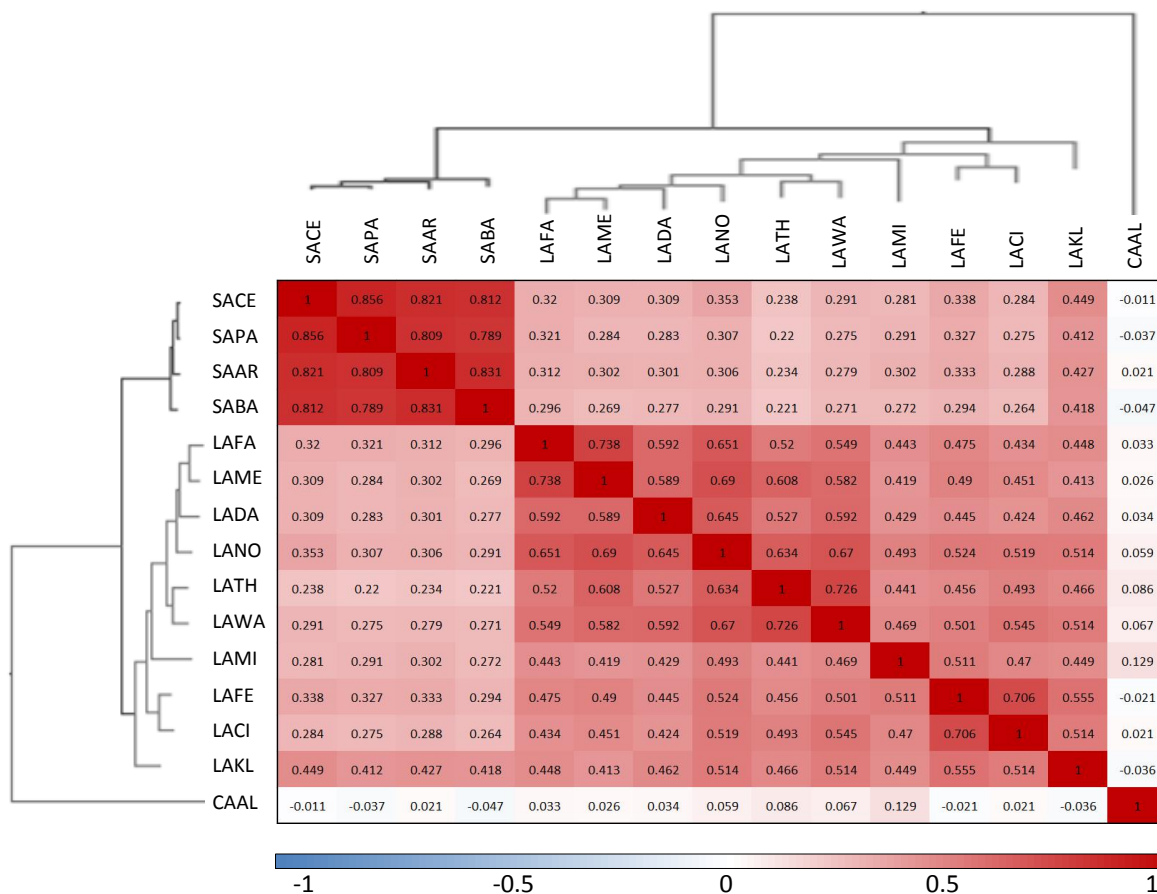

**Supplementary Fig. 4:** Matrix of pairwise Spearman's rank correlation coefficients between replication timing programs in Saccharomycotina species. The species tree is taken from Vakirlis *et al.*, Genome Res, 2016.

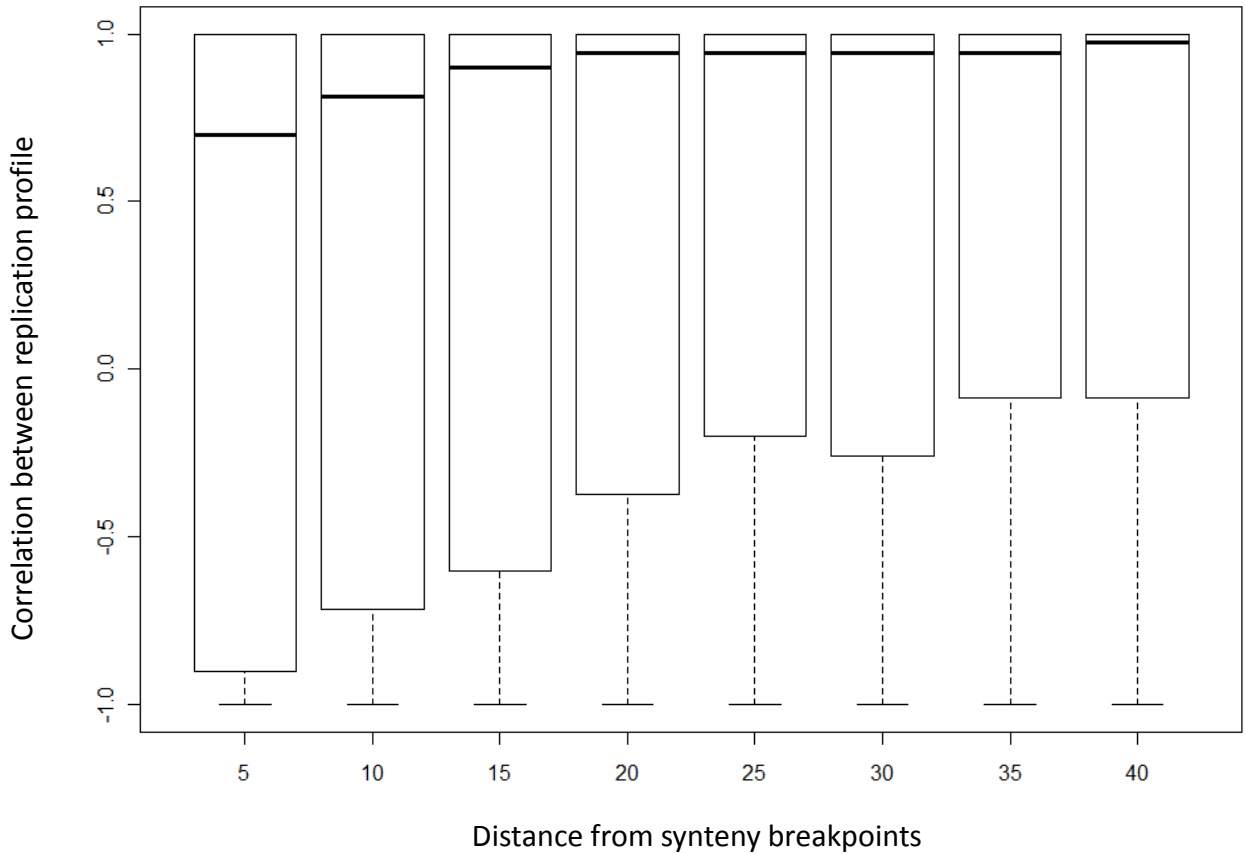

**Supplementary Fig. 5:** Correlation levels between replication profiles at increasing distance from synteny breakpoints. All pairwise comparisons between the 10 *Lachancea* species are merged together. Each boxplot corresponds to a 5 gene non-overlapping sliding window. Whiskers are defined by selecting the value within the range of the 75<sup>th</sup> and 25<sup>th</sup> percentile plus or minus 1.5 x (75<sup>th</sup> percentile – 25<sup>th</sup> percentile) respectively, and at the maximum distance from the median.



**a**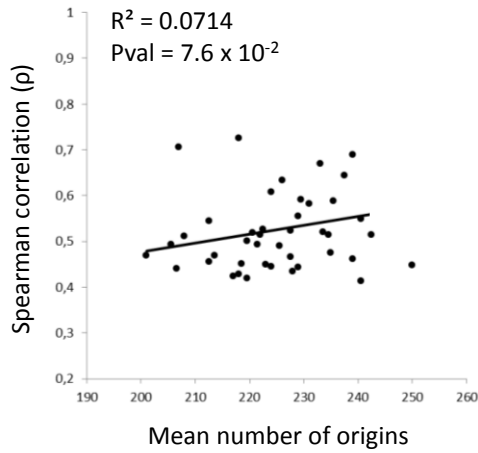**b**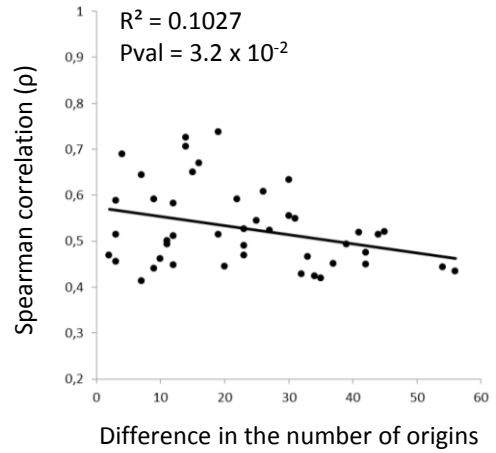

**Supplementary Fig. 6:** Correlation between pairwise replication correlation coefficients and the number of active origins. Each dot corresponds to a pairwise comparison between two species. **a.** Pairwise rank coefficients as a function of the average origin number between the pair of compared species. **b.** Pairwise rank coefficients as a function of the difference in origin number between pairs of compared species.

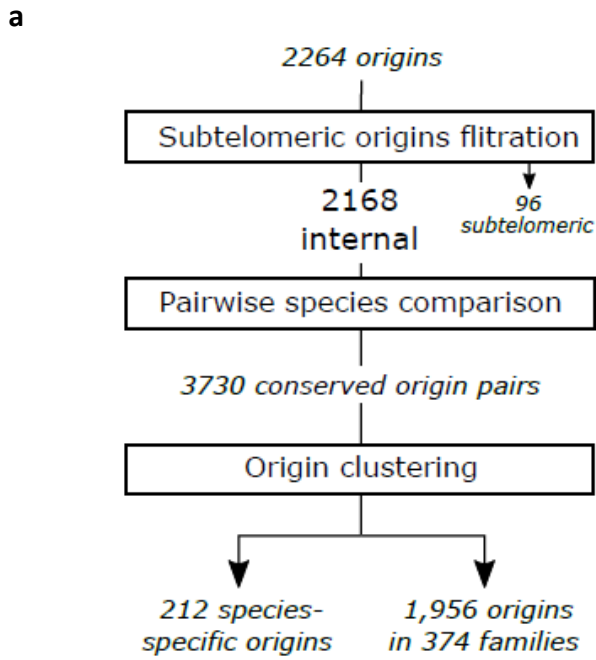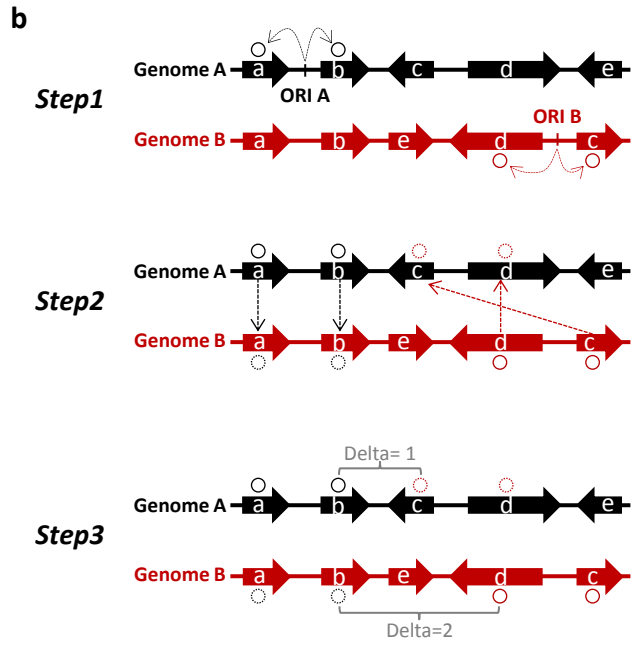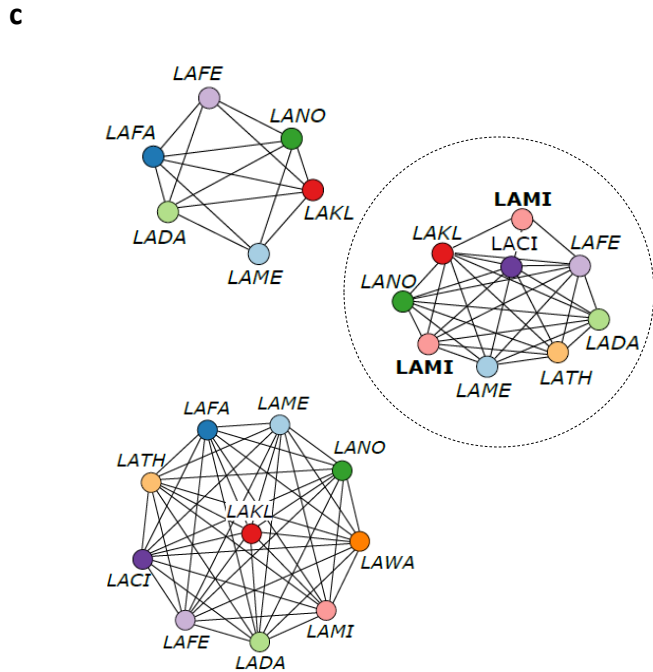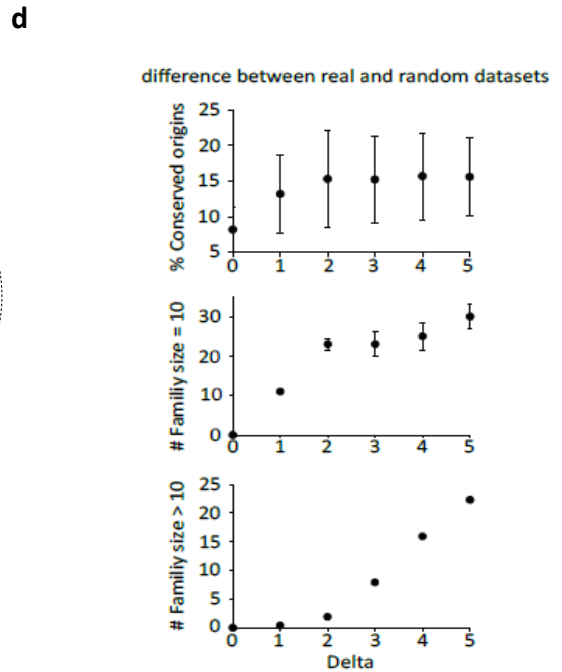

**Supplementary Fig. 7:** Families of orthologous replication origins. **a.** Flowchart representing the different steps in family construction. We excluded 96 subtelomeric origins due to poor synteny conservation and clustered the remaining 2,168 internal origins, representing 96% of the total, into 374 multi-origin families comprising 1,956 origins (90%) and 212 species-specific singleton origins (10%). **b.** Definition of a pair of orthologous origins. Genes, named a to e, are represented by plain arrows. Genome A and B differ by an inversion of genes c, d and e. Step 1: The resident replication origins (ORI A and ORI B, symbolized by open circles) are anchored to their neighboring genes, both on genome A and B. Step 2: Anchored origins from genome A are projected in the syntenic homologs in genome B, and reciprocally. Projected origins are represented by dashed circles. Step 3: The distance in number of genes (Delta) between anchored and projected origins is calculated in both genomes. The two resident origins are considered as orthologous if both Deltas are  $\leq 2$ . **c.** Examples of 3 origin families represented as connected components. Species names are abbreviated as in Fig. 3. The circled family contains two origins from the species LAMI resulting from the presence of two closely located origins assembled into a single connected component during the aggregation of orthologous origin pairs. Similar cases are found in 27 out of the 374 families. **d.** Estimation of the optimal number of syntenic genes between 2 origins allowed for origin clustering. The threshold of  $\Delta=2$  syntenic genes is the smallest value that maximized the median difference in the percentage of conserved origins between the real and 100 random datasets (top), maximized the median difference of the number of families comprising 10 origins between real and a 100 random datasets (middle) and minimized the number of families with more than 10 members in the real dataset (bottom). For the two upper plots, the random datasets correspond to simulations based on a null model that preserves the same distribution of inter-origin distances as in real genomes; error bars represent the standard deviation of the differences.

**a**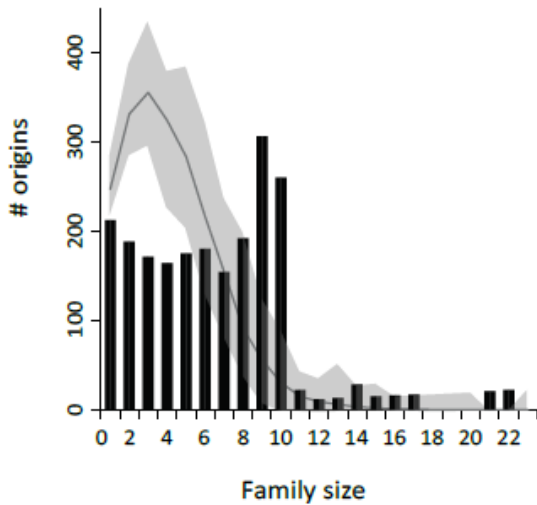**b**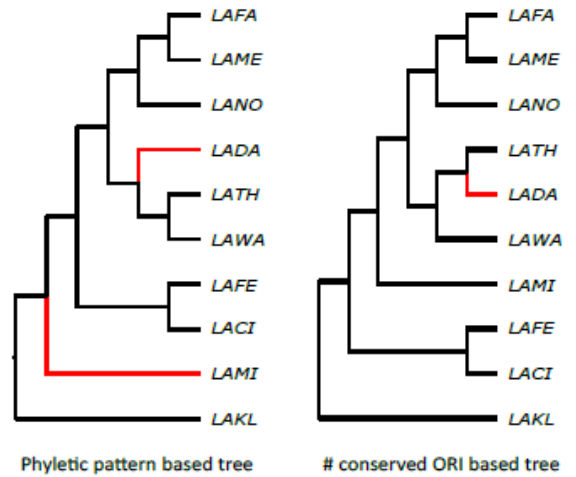

**Supplementary Fig. 8:** Characterization of the families of orthologous replication origins. **a.** Distribution of the number of origins per family. The black histogram represents the distribution of the actual family sizes while the curve represents the distribution of the median and standard deviation (grey area) obtained from 100 simulations based on a null model with the same distribution of inter-origin distances as in real genomes. **b.** Neighbor Joining phylogenetic trees based on the composition of orthologous origin families based on the phyletic patterns of origin families (left) and on a distance matrix representing the proportion of conserved origins between pairs of species. The two resulting tree topologies are very similar to the topology of the reference species tree based on the concatenation of 3,598 orthologous protein sequences (Vakirlis *et al.*, Genome Res, 2016). The only few bipartitions being different from the species tree are highlighted in red. Species names are abbreviated as in Fig 3.

Origin gains | losses

*Lachancea* specific origins

Ancestral origins

Origins shared by all species

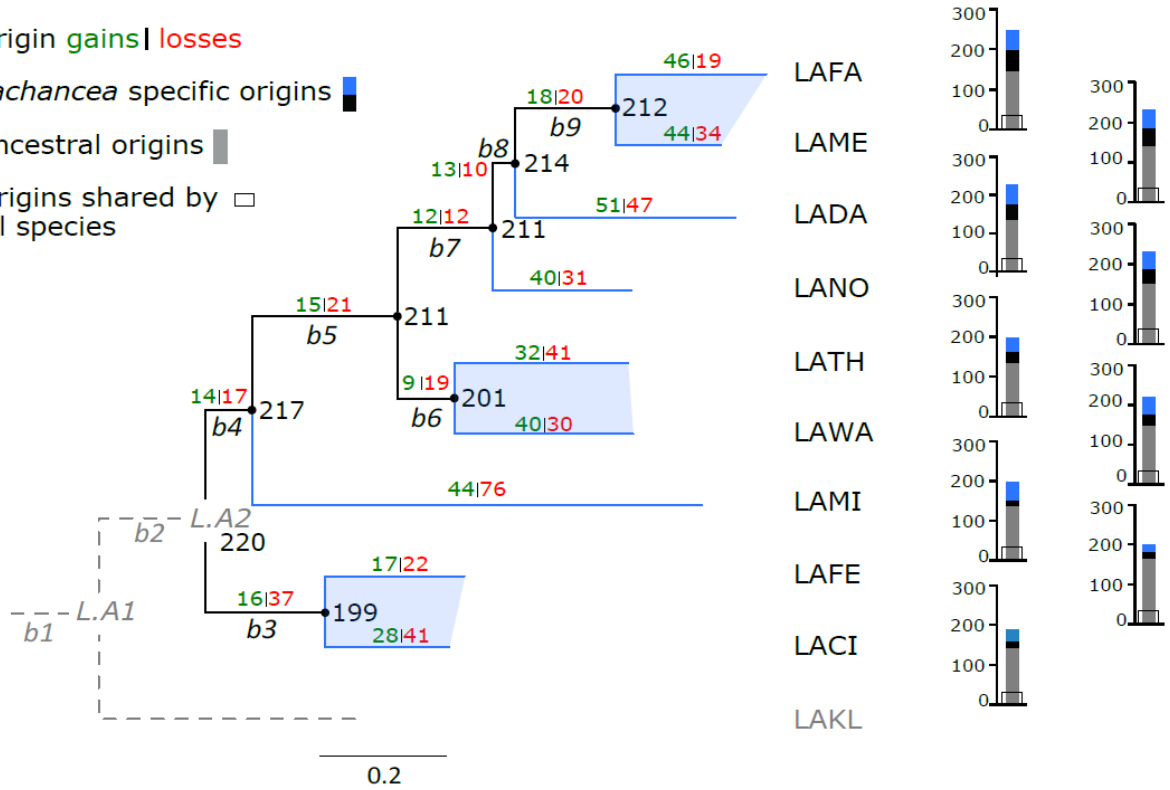

**Supplementary Fig. 9:** Individual contribution of *Lachancea* species to the evolutionary dynamics of replication origins. The phylogenetic tree on the left is taken from Fig. 3a. Histograms on the right indicate the number of active origins that were vertically inherited from the *L.A2* ancestor (in grey), gained on internal branches of the tree (in black) and gained on terminal branches (in blue). The proportion of ancestral origins retained in all nine genomes (not considering LAKL) is indicated by the open frame.

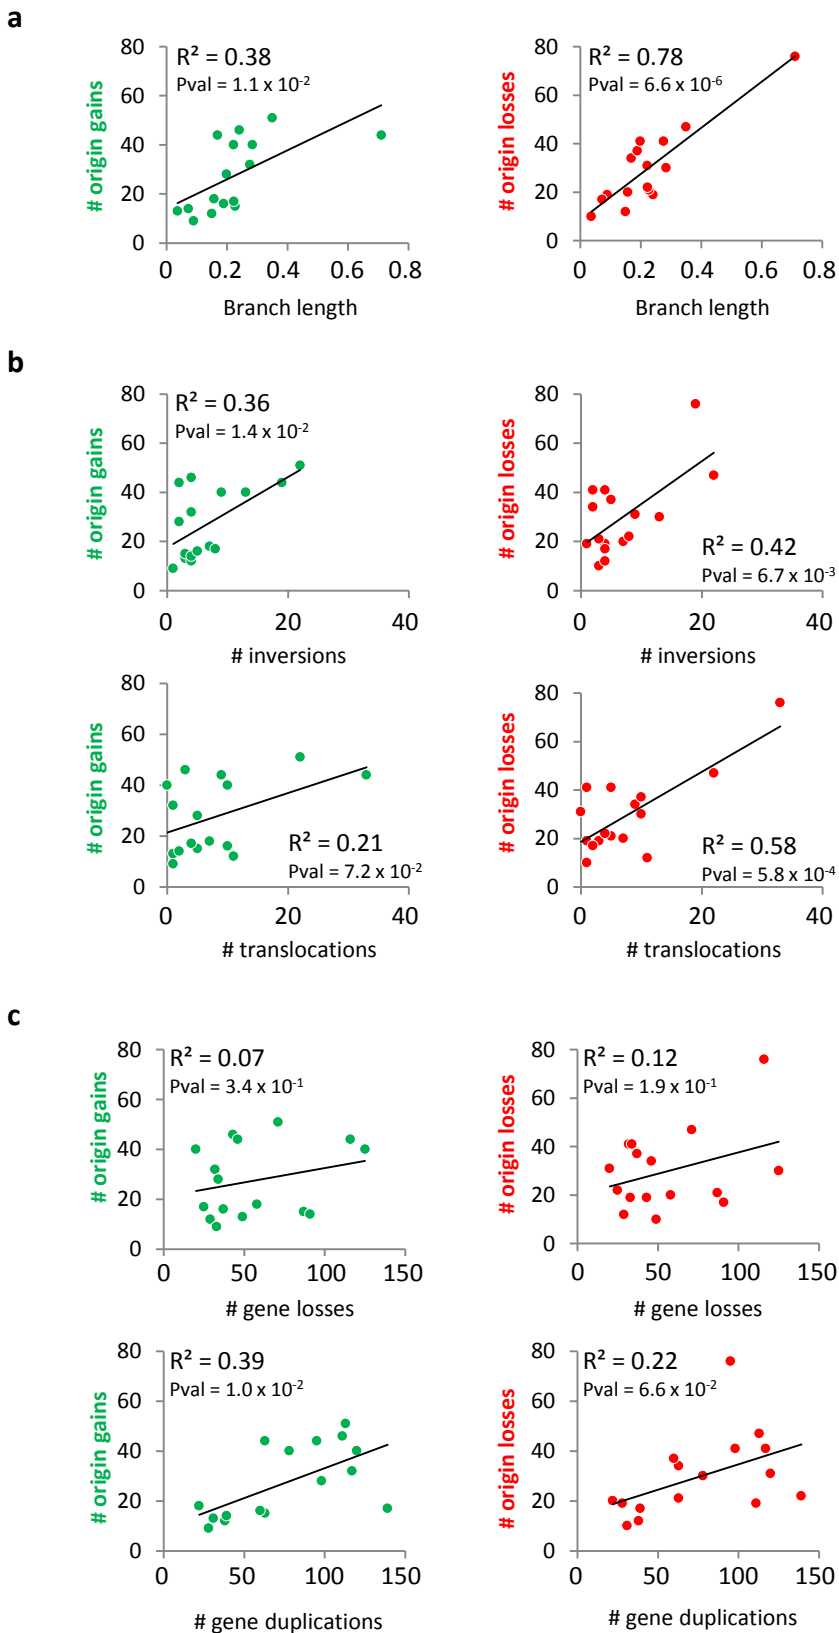

**Supplementary Fig. 10:** Relationship between origin gains and losses and mutational events. Correlations between both gains and losses and **a.** non-synonymous substitution rates, **b.** balanced chromosomal rearrangements and **c.** gene losses and gene duplications. Pearson correlation coefficients and associated P-values are indicated.

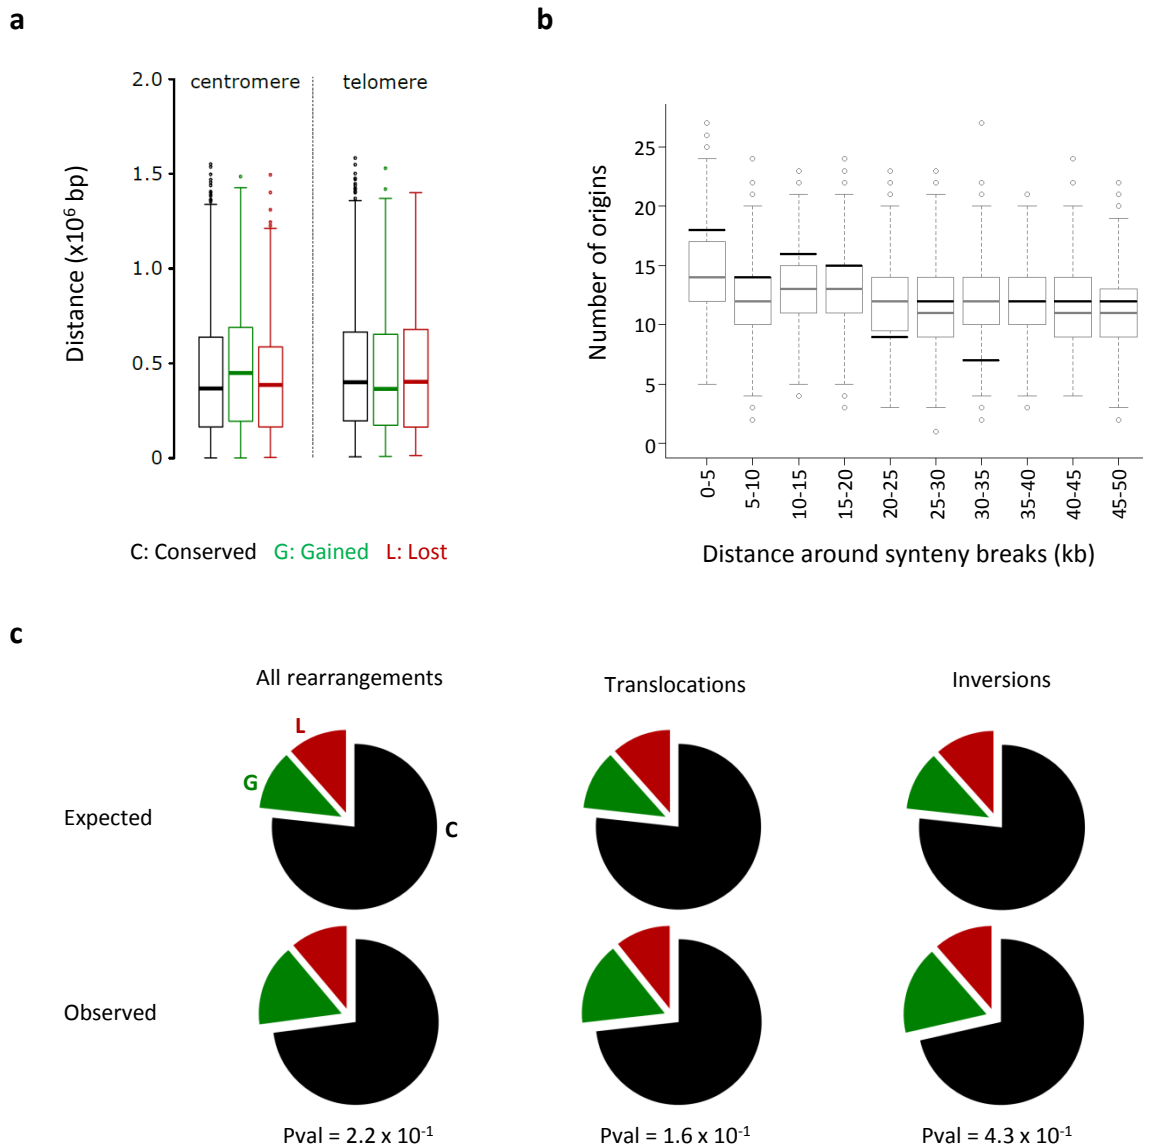

**Supplementary Fig. 11:** Distances between active replication origins and specific chromosomal sites. We focus here on the most recent events that occurred on the six terminal branches of the tree that lead to the three most closely related pairs of species (see blue shaded area in Fig. 3). **a.** Boxplots showing the distance distribution between conserved (C), gained (G) and lost (L) origins and both their respective centromere (left panel) and closest telomere (right panel). **b.** Number of origins found in non-overlapping 5 kb windows centered around synteny breakpoints. The observed data are indicated by the black dashes and the boxplots show the distribution from 1000 simulations based on the null model that preserves the same distribution of inter-origin distances as in real genomes. For a and b, Whiskers are defined by selecting the value within the range of the 75<sup>th</sup> and 25<sup>th</sup> percentile plus or minus  $1.5 \times (75^{\text{th}} \text{ percentile} - 25^{\text{th}} \text{ percentile})$  respectively, and at the maximum distance from the median. **c.** Comparisons between the expected and observed numbers of C, G and L origins in 50 kb windows centered around the rearrangement breakpoints for the three most closely related pairs of species. P-values were calculated from Goodness of Fit Chi-Square tests. The theoretical values correspond to the number of different types of origins expected at random in the same total window size than for the observed values. The same calculations were also performed in each individual species and no significant difference was found between observed and expected number of origins.

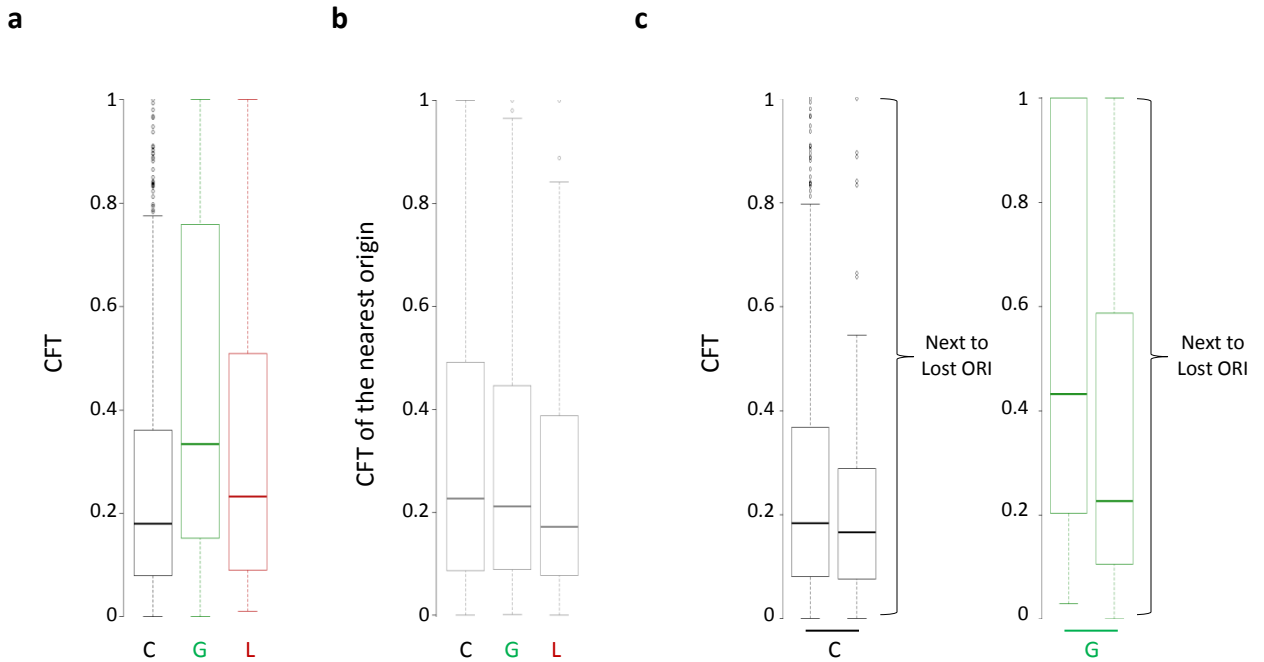

**Supplementary Fig. 12:** Characteristic firing times (CFT) of conserved and recently gained and lost origins. We focus here on the most recent events that occurred on the six terminal branches of the tree that lead to the three most closely related pairs of species (see blue shaded area in Fig. 3). **a.** Distribution of the CFT of conserved (C), gained (G) and lost (L) origins. **b.** CFT distributions of the neighboring origins flanking C, G and L origins. **c.** Split distributions of the CFT of C and G origins based on the category of their neighboring origins (ORI). Boxplot whiskers are defined by selecting the value within the range of the 75<sup>th</sup> and 25<sup>th</sup> percentile plus or minus  $1.5 \times (75^{\text{th}} \text{ percentile} - 25^{\text{th}} \text{ percentile})$  respectively, and at the maximum distance from the median.



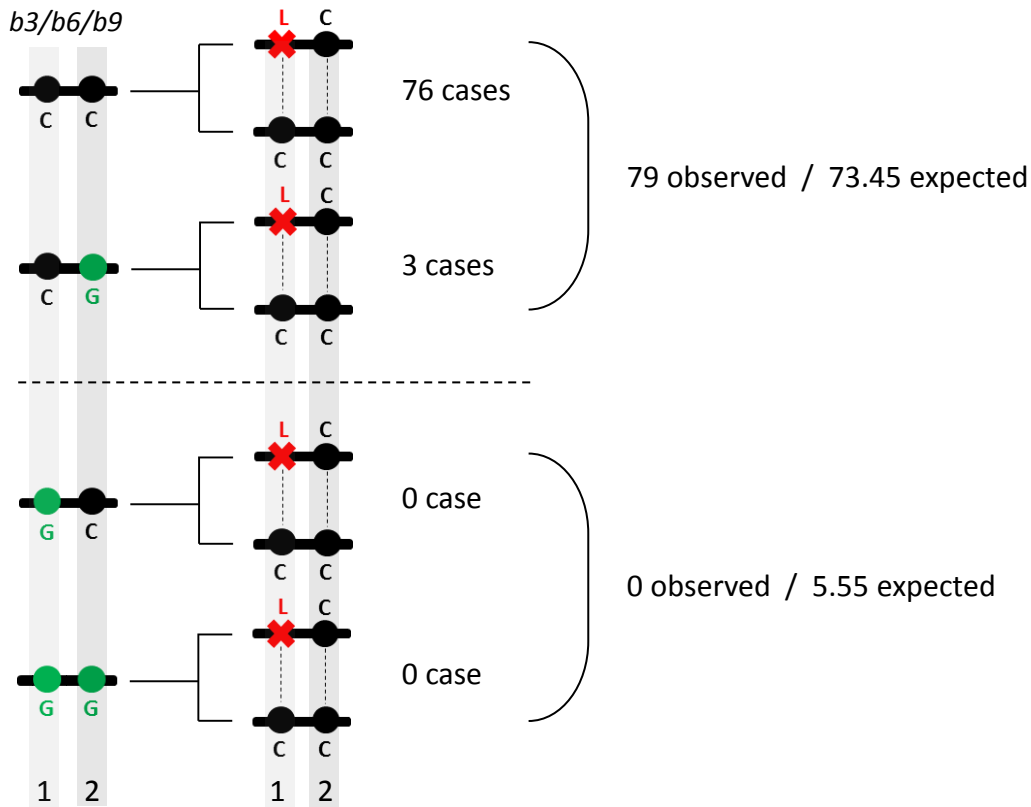

**Supplementary Fig. 13:** Categories of origins that were lost in the terminal branches leading to the 3 pairs of sister species *L. fantastica*, *L. meyersii*, *L. thermotolerans*/*L. waltii* and *L. fermentati*/*L. cidri*. The 79 origins losses (L) were categorized based on the state, conserved (C) or gained (G), of their ancestral origins in the preceding internal branches (*b3*, *b6* or *b9* in Fig. 3a). Position 1 (light-grey shading) spots the location of the origin losses and position 2 (dark-grey shading) the location of the nearest neighboring origin. The expected proportion of each category was estimated from the proportion of conserved and gained origins in the corresponding ancestral genomes. The difference between the expected and observed numbers of categories is statistically significant ( $\text{Chi}^2 P = 0.04927$ ).

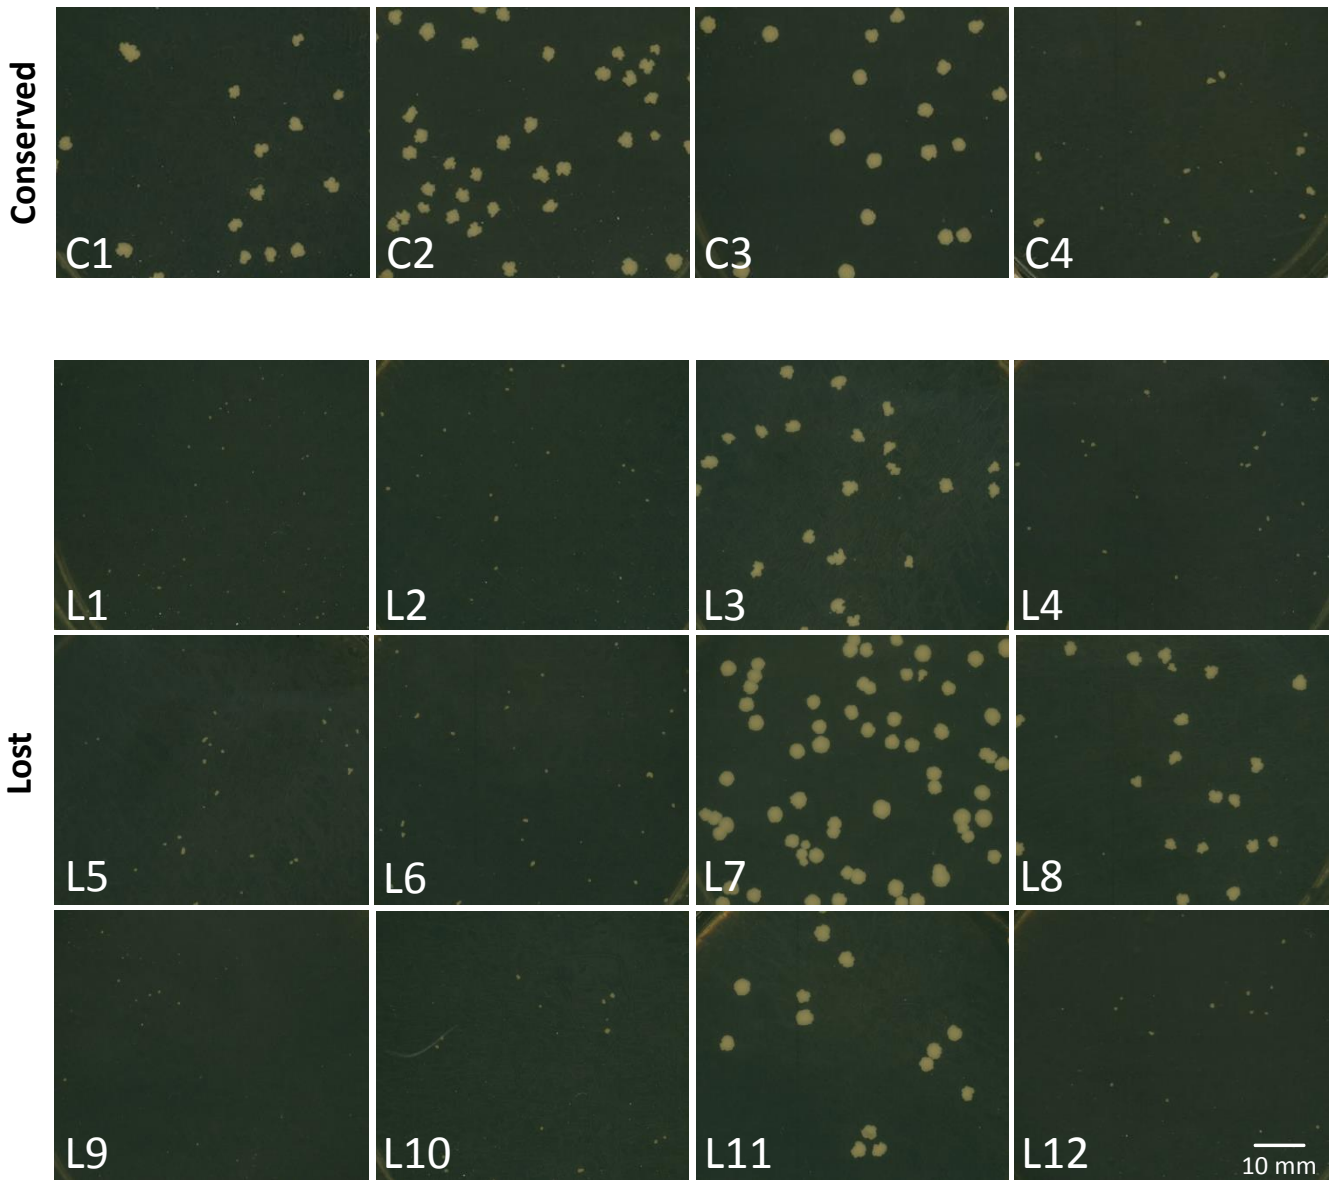

**Supplementary Fig. 14:** ARS Assay. Snapshot of the plates 4 days after transformation of *L. thermotolerans*. C1 to C4 correspond to cells transformed with centromeric plasmids into which 4 origins conserved between *L. thermotolerans* and *L. waltii* were cloned. L1-L12 correspond to cells transformed with centromeric plasmids into which regions of lost origins in *L. thermotolerans*, but chromosomally active in *L. waltii*, were cloned. Scale bar in L12 is the same for all pictures.

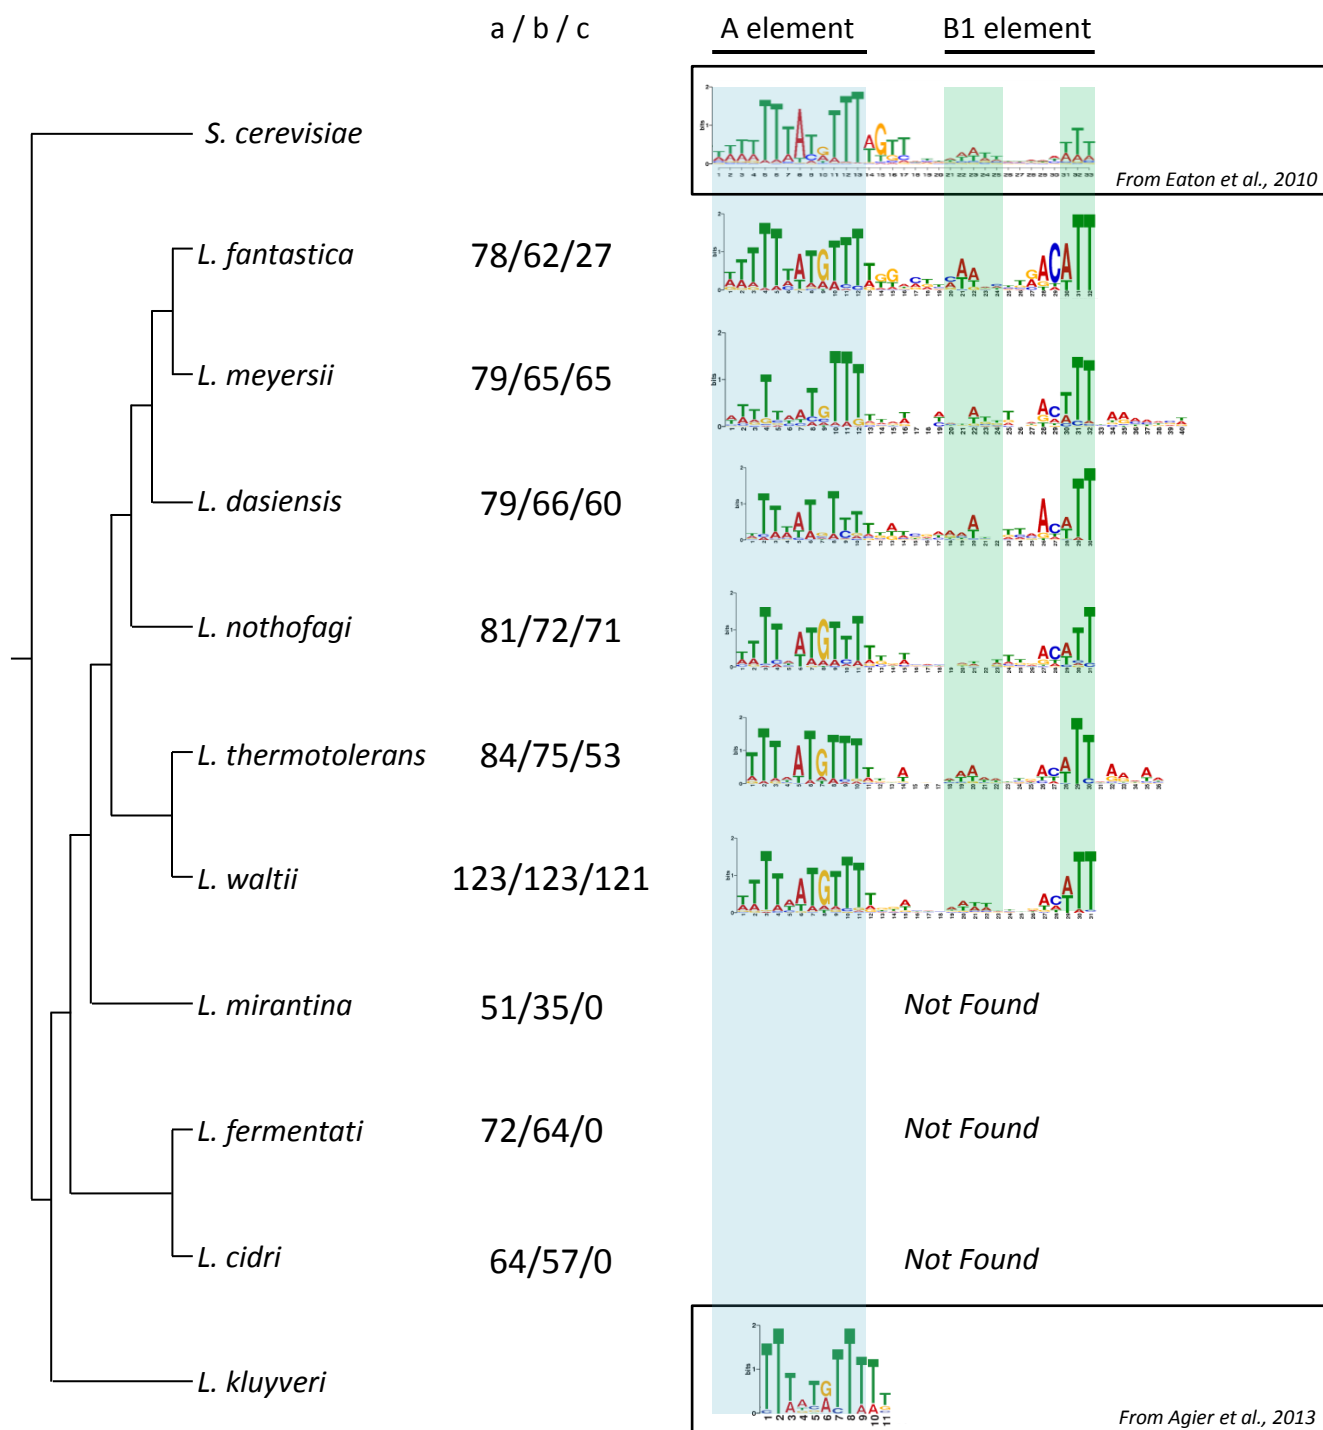

**Supplementary Fig. 15:** Alignment of ACS consensus sequence (ACS) for the 10 *Lachancea* species and *S. cerevisiae*. The *S. cerevisiae* motif was taken from Eaton *et al.* (Genes Dev, 2010) and the *L. kluyveri* motif was taken from Agier *et al.* (Genome Biol Evol, 2013). The ACS A element (blue box) and the B1 element (green boxes) are represented as illustrated in Di Rienzi *et al.* (Genome Res, 2012). a/b/c: number of origin families with one member having both an ACS in *L. waltii* and an orthologous origin within the alternate species/number of regions conserved in strict synteny between *L. waltii* ACS and the alternate species/number of detected ACS. We found no motif in *L. kluyveri* however, the A element of the ACS previously reported in *L. kluyveri* is similar to the *L. waltii/L. thermotolerans/S. cerevisiae* motif

**a**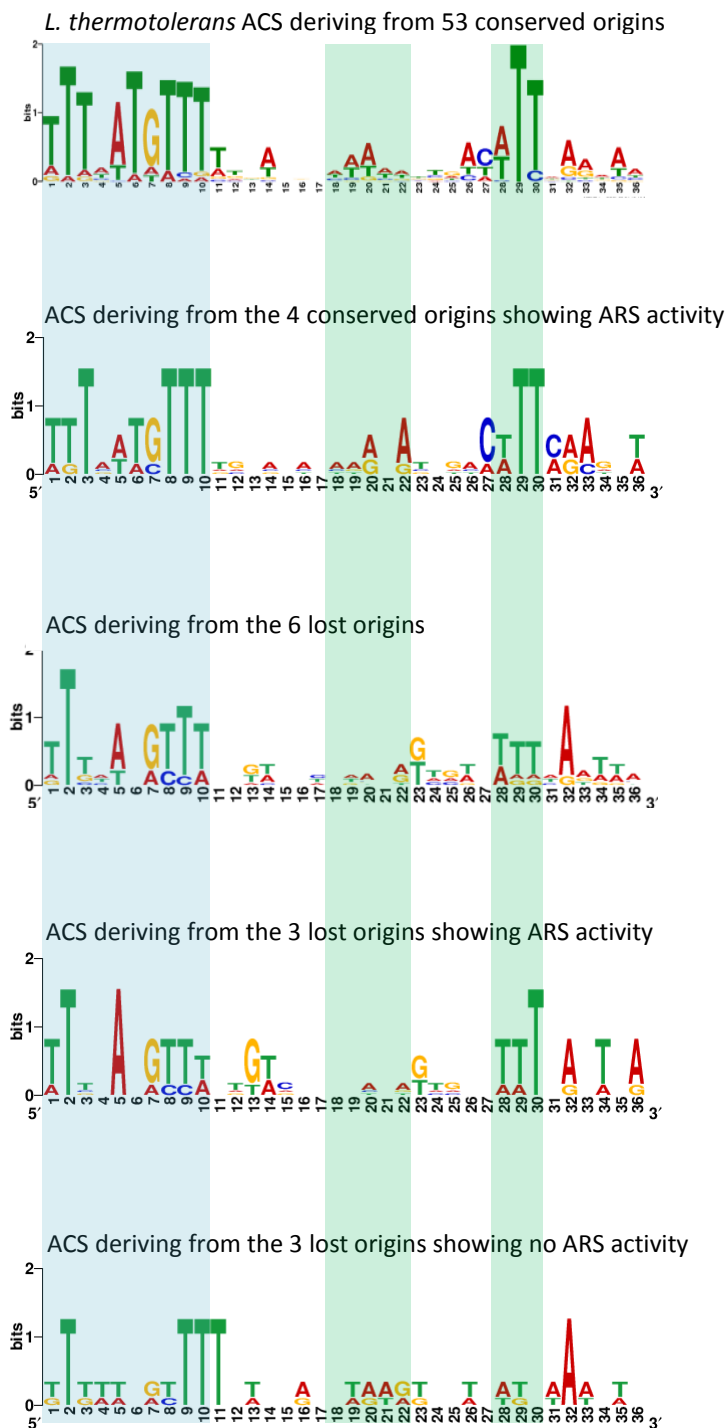**b**

```

1      10      20      30      36
|-----|-----|-----|
CONS4  TTTAATGTTTTCCACAAAAATTGACATTCGAART
CONS2  TTTAATGTTTAACTTTTCGAAGGGCCTTTCGATCA
CONS1_1 TTTATAGTTTGTAGAGTAGTACTGACTTTCAGAT
CONS3  TTTCATGTTTGGGGACATGGATCTACTTTAAGTT
CONS1_2 AGTGTCTTTTGARATATAATGTCATATTAACGTA
Consensus tTt.ttgTTTTg.a.a.aaatatc.actTTaaagt

```

```

1      10      20      30      37
|-----|-----|-----|
LOSS12 TTTAAGTCTA-TGTCACAGATTTGAARTTCAGTGA
LOSS13-2 ATTCAGTTTT-AGTCTAAATAATTGTCTTTCAGTTA
LOSS13-1 TTCAGGCTACTGACCCTAGAGTGACTATAAATTA
LOSS10  TTTATCAGTTGTACATAAAGTCGTCATGTAATC
LOSS8   GTGTATGTTTTACACTTGTGGAAAGATAAAGAT
LOSS16  TTTATGTTTGGGTATGGATGGAGTTTTTGTAA
LOSS13-3 TTTATGTTTAGTTAGTTTCCAGCCTTTTAAAG
LOSS4   TTTTGGTTTTCTTGACTAATTCCTTTGTAATTA
Consensus tTt.atgttt...a...taaag..gt.tttaa.a..

```

```

1      10      20      30      39
|-----|-----|-----|
LOSS12 TTTAAGTCTA-TGTCACAGATTTGAARTTCAGTGA
LOSS13-2 ATTCAGTTTT-AGTCTAAATAATTGTCTTTCAGTTA
LOSS13-1 TTCAGGCTACTGACCCTAGAGTGACTATAAATTA
LOSS16  TTTATGTTTGGGTATGGATGGAGTTTTTGTAA
LOSS13-3 TTTATGTTTAGTTAGTTTCCAGCCTTTTAAAG
Consensus .TTcaag.tTa..Gtta.t.....gacttTtt.ttAa.

```

```

1      10      20      30      38
|-----|-----|-----|
LOSS8   GTGTATGTTTTACACTT-GTGGAAAGATAAAGAT
LOSS10  TTTATCAGTTTGTACATAAAGTCGTCATGTAATC
LOSS4   TTTTGGTTTTCTTGACTAATTCCT-TTGTAAATTA
Consensus tTt.T...TTT.Tacaact.aagT.gt.atgTAAat.a.

```

**Supplementary Fig. 16:** ACS of various *L. thermotolerans* regions. **a.** LOGO generated using WEBLOGO (Crooks GE et al., Genome Research, 2004). **b.** Multiple alignment using multalin (Corpet, Nucl. Acids Res., 1988) of the ACS-containing DNA sequences used to generate the logo representations in a.

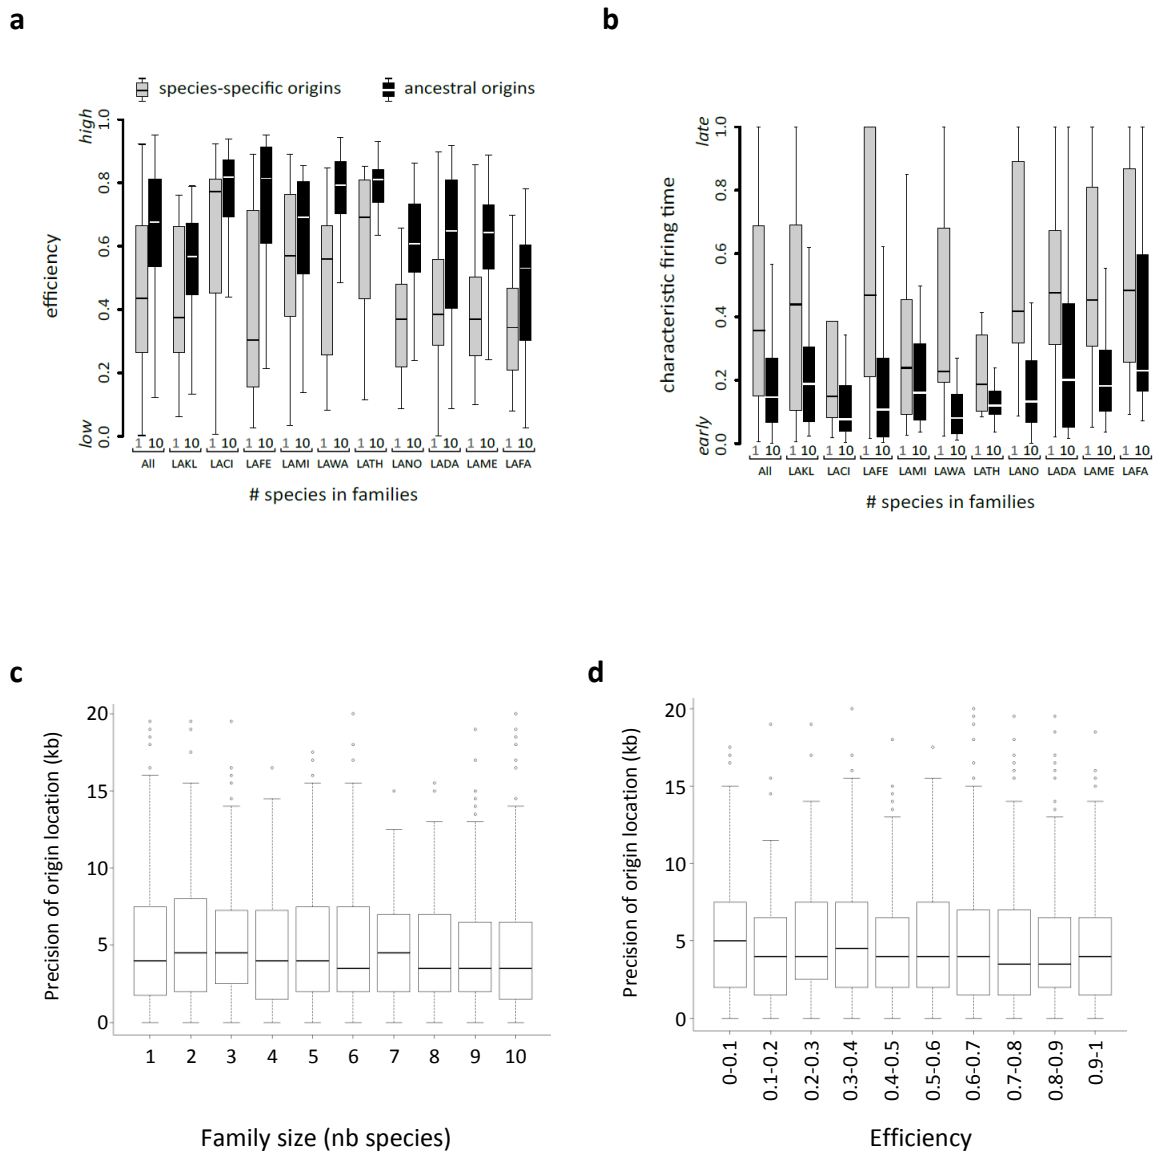

**Supplementary Fig. 17:** Relationship between functional properties of active replication origins and origin family size. Differences in efficiencies (**a**) and firing times (**b**) between species-specific origins (in grey) and ubiquitous origins shared by all 10 species (in black). Species names are abbreviated as in Fig. 3. We checked that these differences in efficiency and firing time between singleton and ubiquitous origins were not due to a methodological problem during the clustering of low efficiency origins. Given that the family clustering was solely based on chromosomal locations, we checked whether the precision of origin location was not linked to the family size (**c**) or affected by origin efficiency (**d**), ruling out the possibility that species-specific origins would have remained singletons due to their low efficiency. For all graphs, boxplot whiskers are defined by selecting the value within the range of the 75<sup>th</sup> and 25<sup>th</sup> percentile plus or minus 1.5 x (75<sup>th</sup> percentile – 25<sup>th</sup> percentile) respectively, and at the maximum distance from the median.

**a**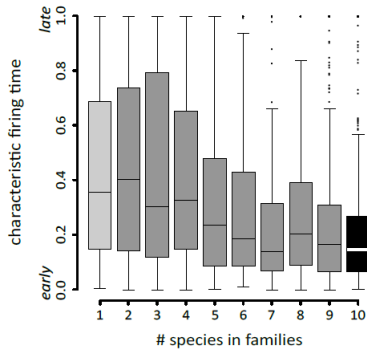**b**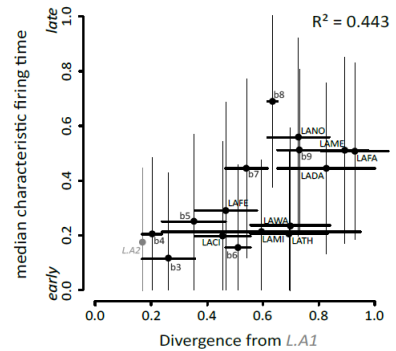

**Supplementary Fig. 18:** Relationship between characteristic firing times and origin evolutionary age. **a.** Distribution of the characteristic firing times as a function of the number of species comprised into the families of orthologous origins. Boxplot whiskers are defined by selecting the value within the range of the 75<sup>th</sup> and 25<sup>th</sup> percentile plus or minus 1.5 x (75<sup>th</sup> percentile – 25<sup>th</sup> percentile) respectively, and at the maximum distance from the median. **b.** Correlation between characteristic firing times and origin age for 546 origin families comprising 220 ancestral and 326 *Lachancea*-specific families. Each dot represents the median characteristic firing time of all the replication origins that appeared in a given branch of the phylogenetic tree. The x-axis represents the total branch length between *L.A2* (the last common ancestor of the 9 species indicated in light-grey) and the branch of appearance of the new origins. The most ancestral origins are on the left while the youngest lie on the right of the plot. Vertical error bars represent the standard deviation of origin efficiencies and horizontal bars represent the span of the branch lengths based on the phylogenetic tree in Fig. 3.

*Lachancea kluyveri*

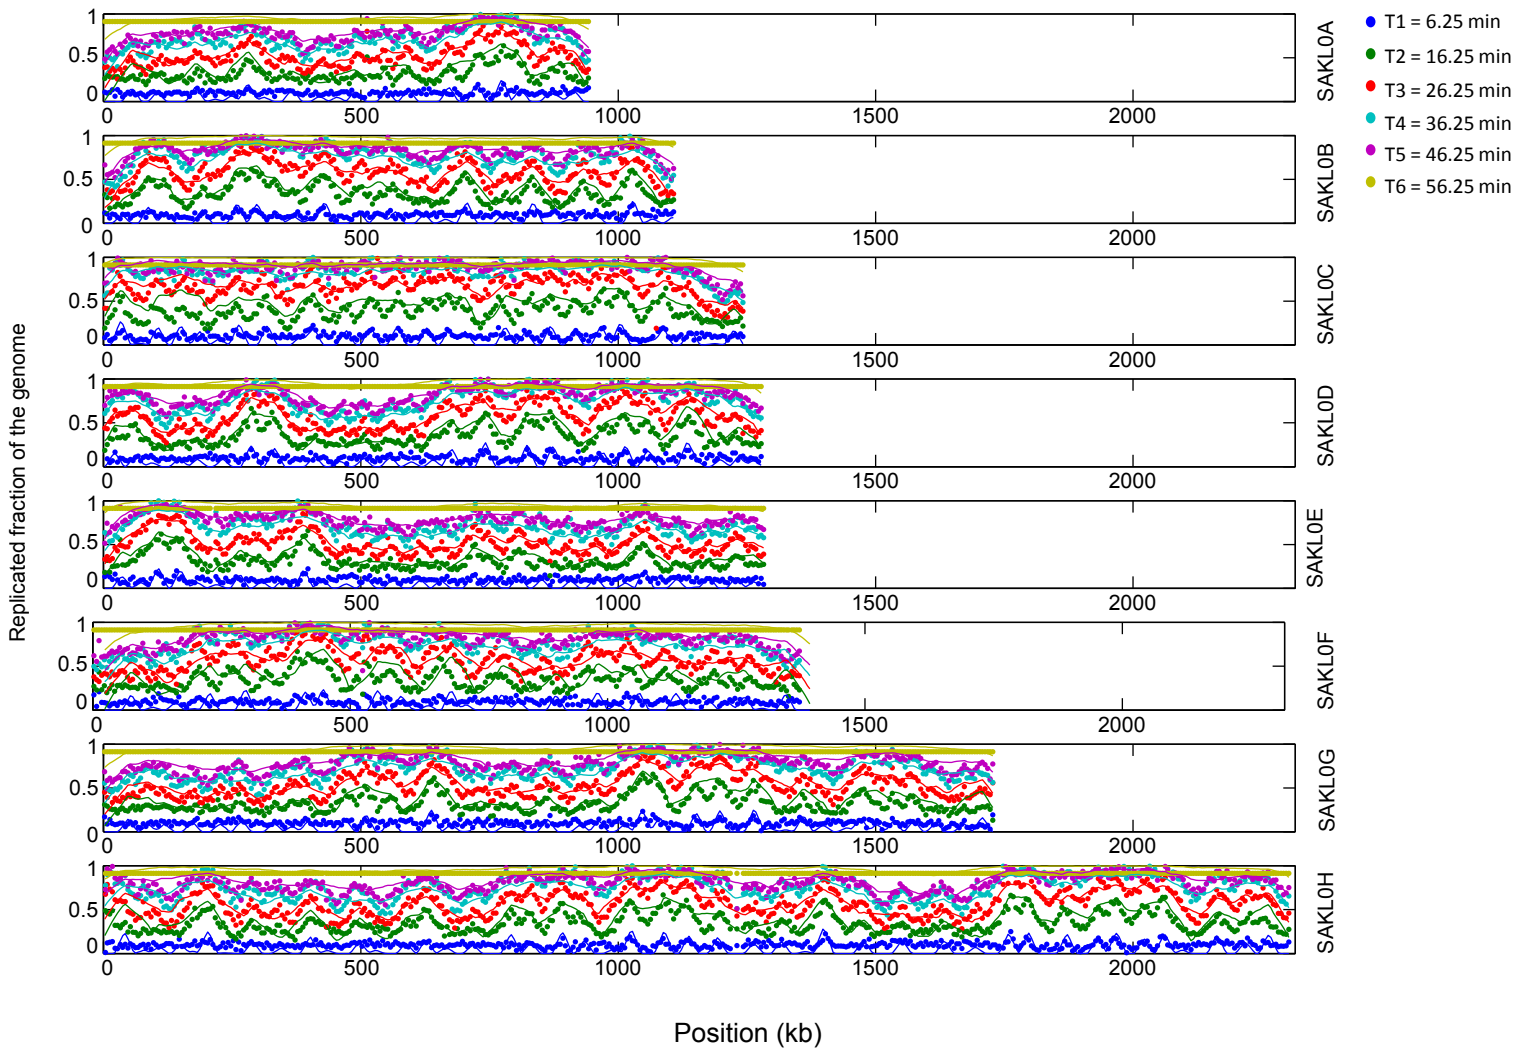

*Lachancea cidri*

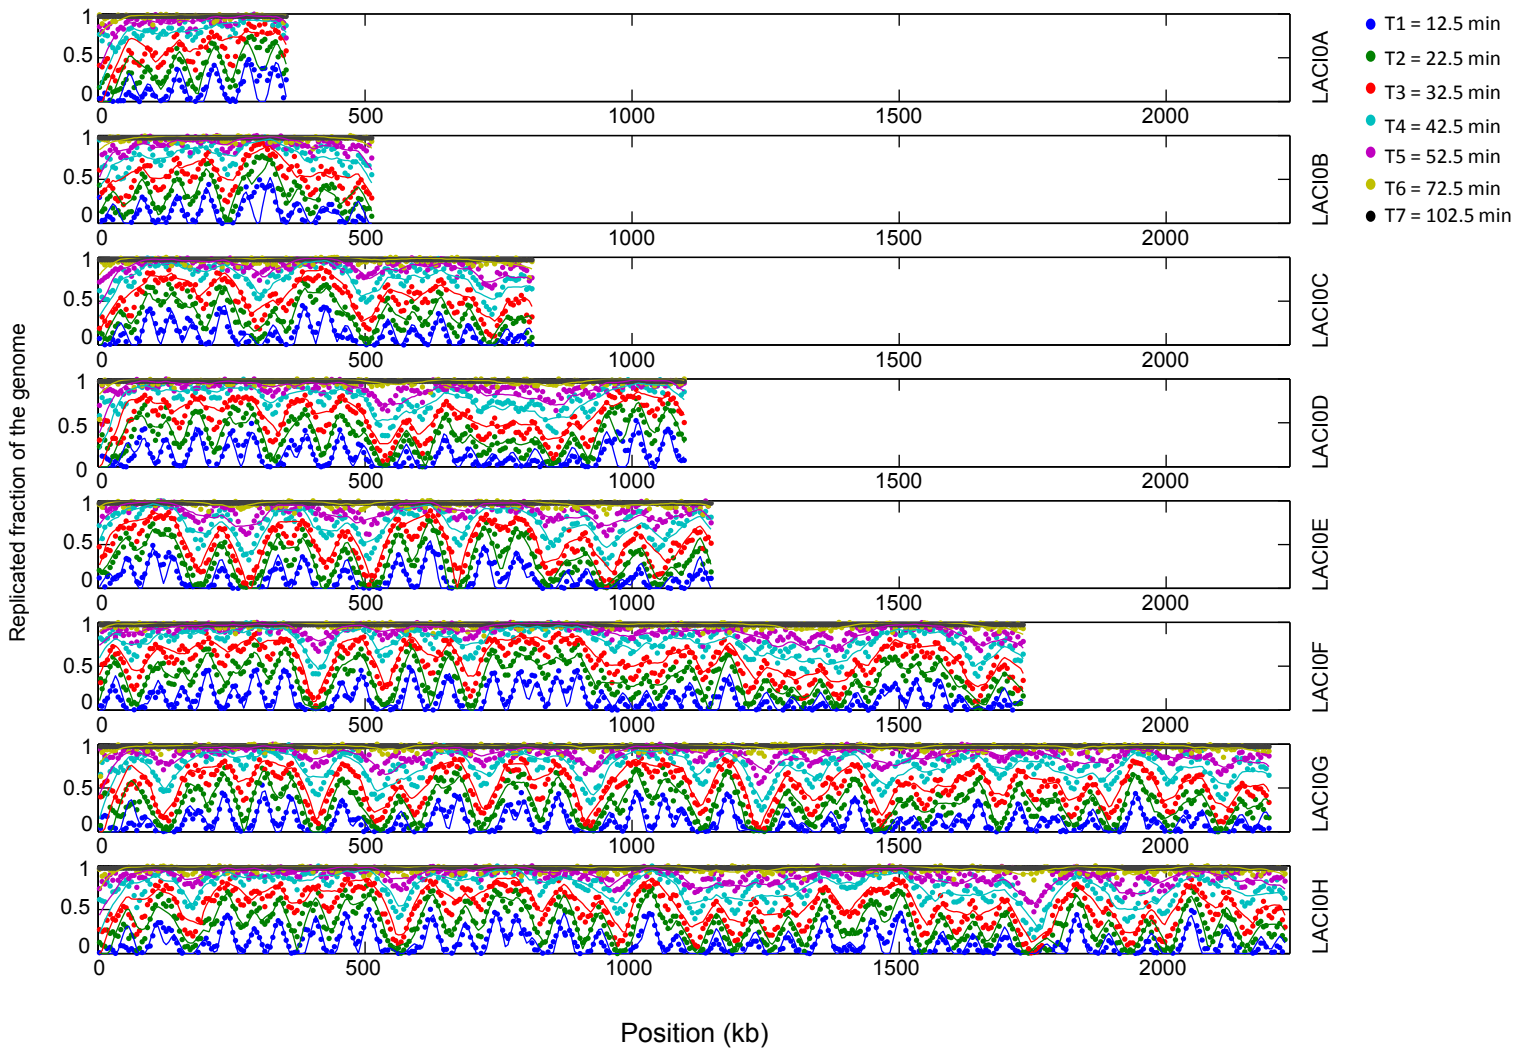



*Lachancea fermentati*

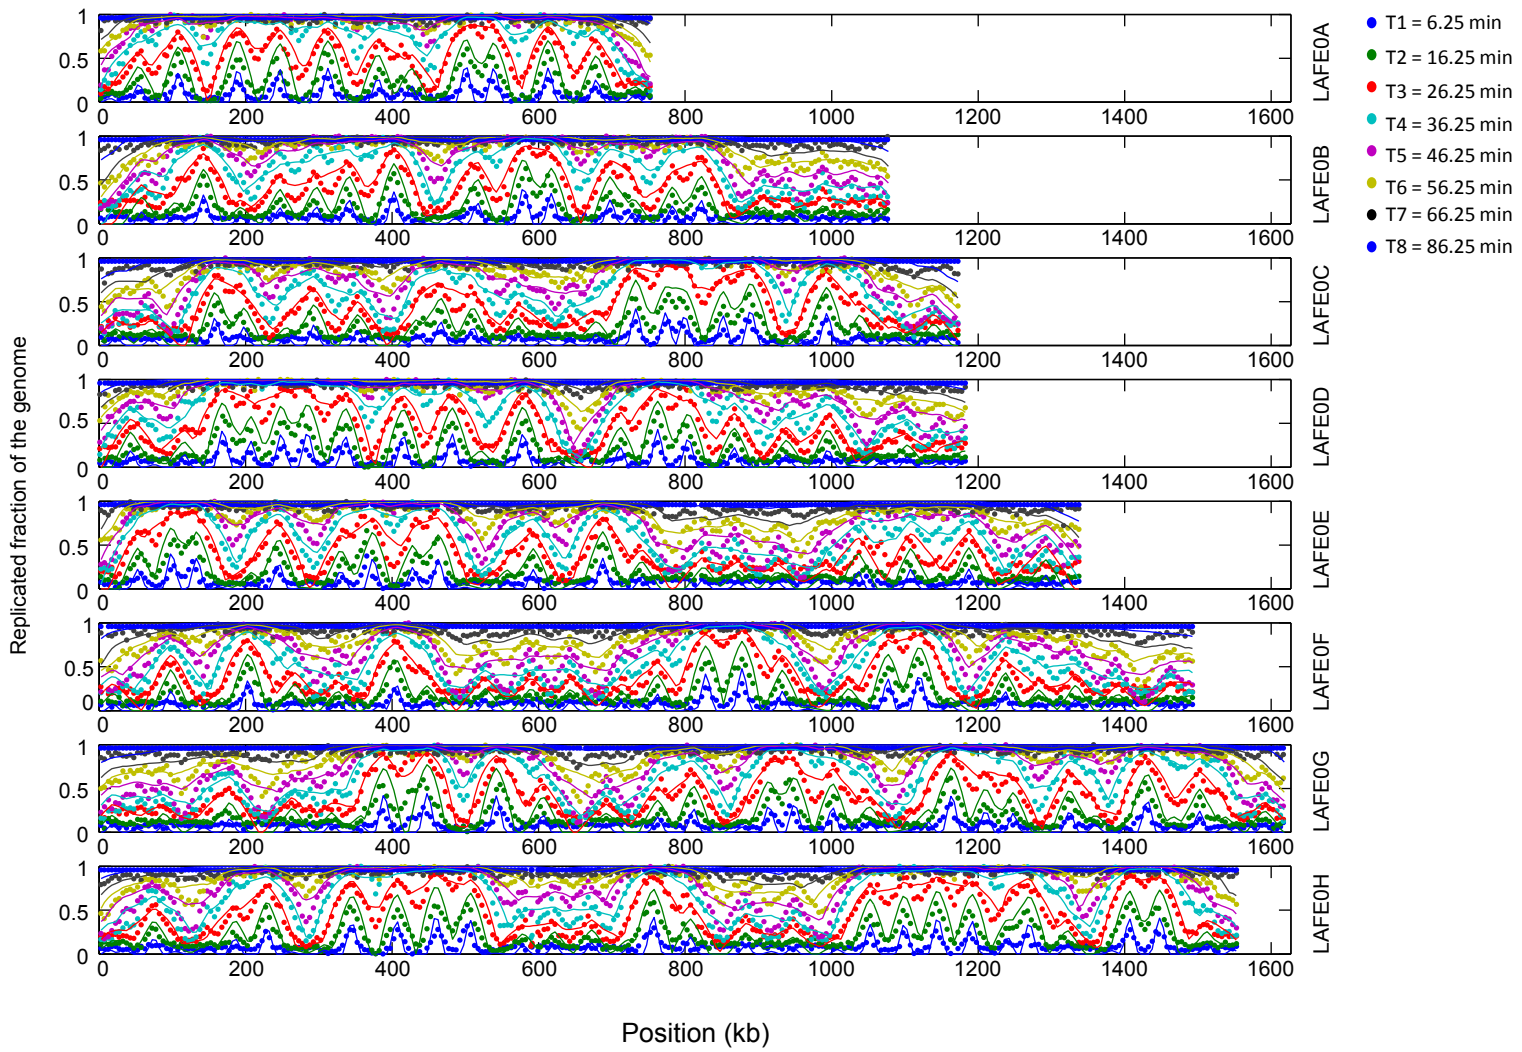

*Lachancea mirantina*

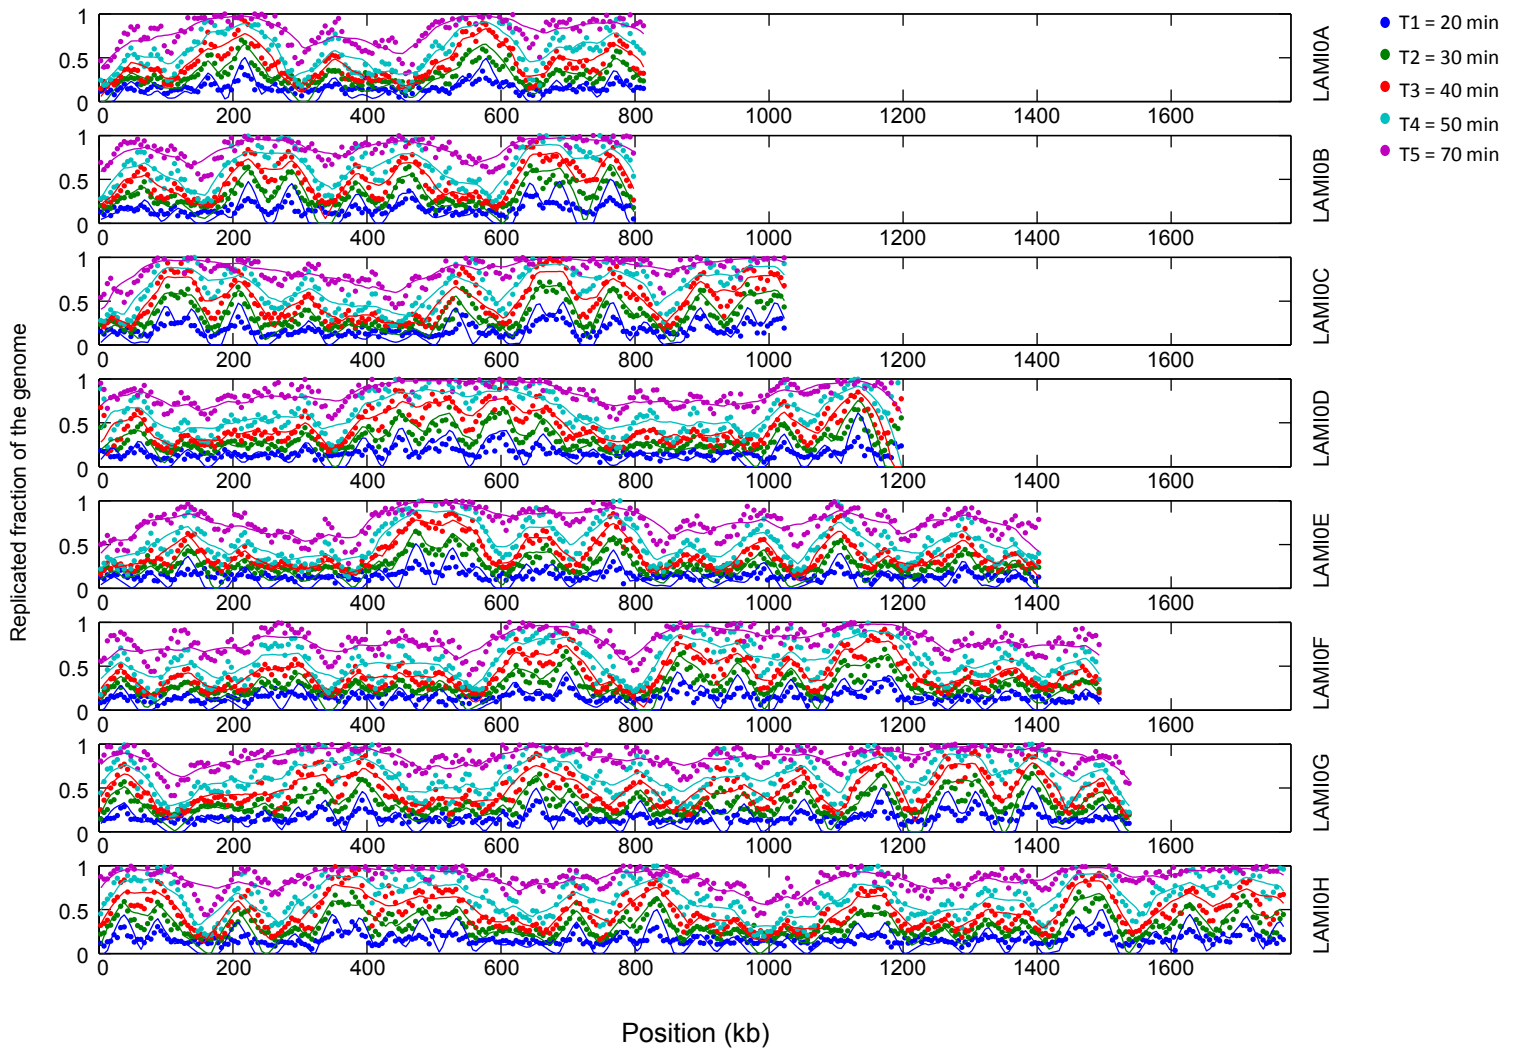

*Lachancea waltii*

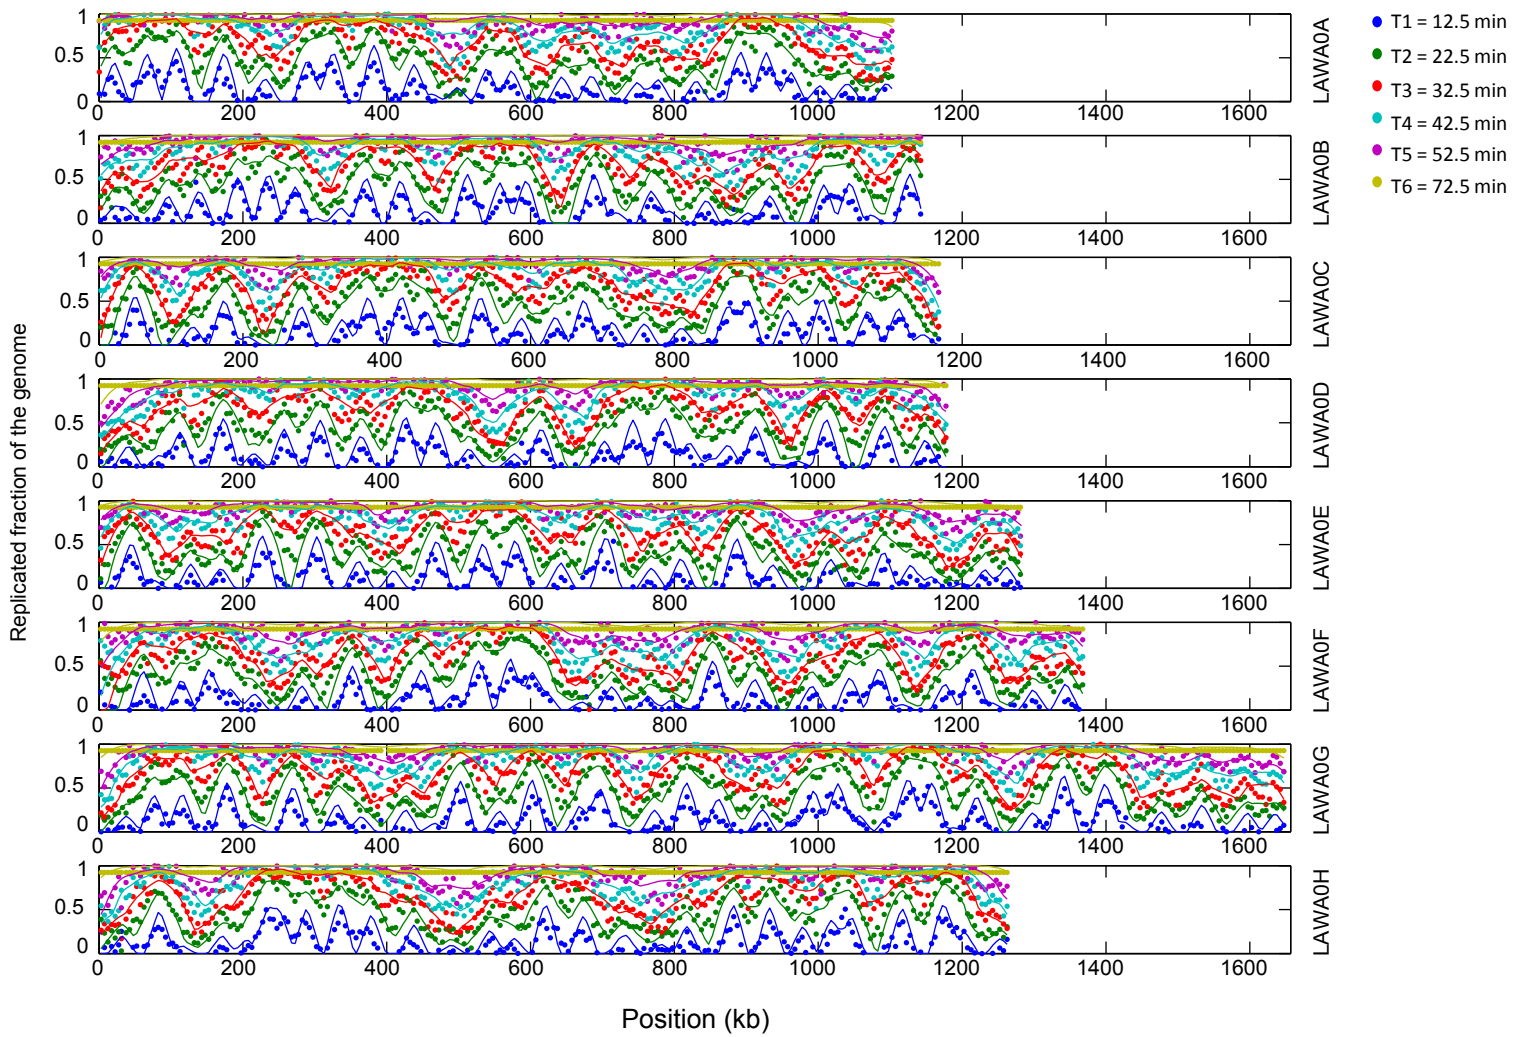

*Lachancea thermotolerans*

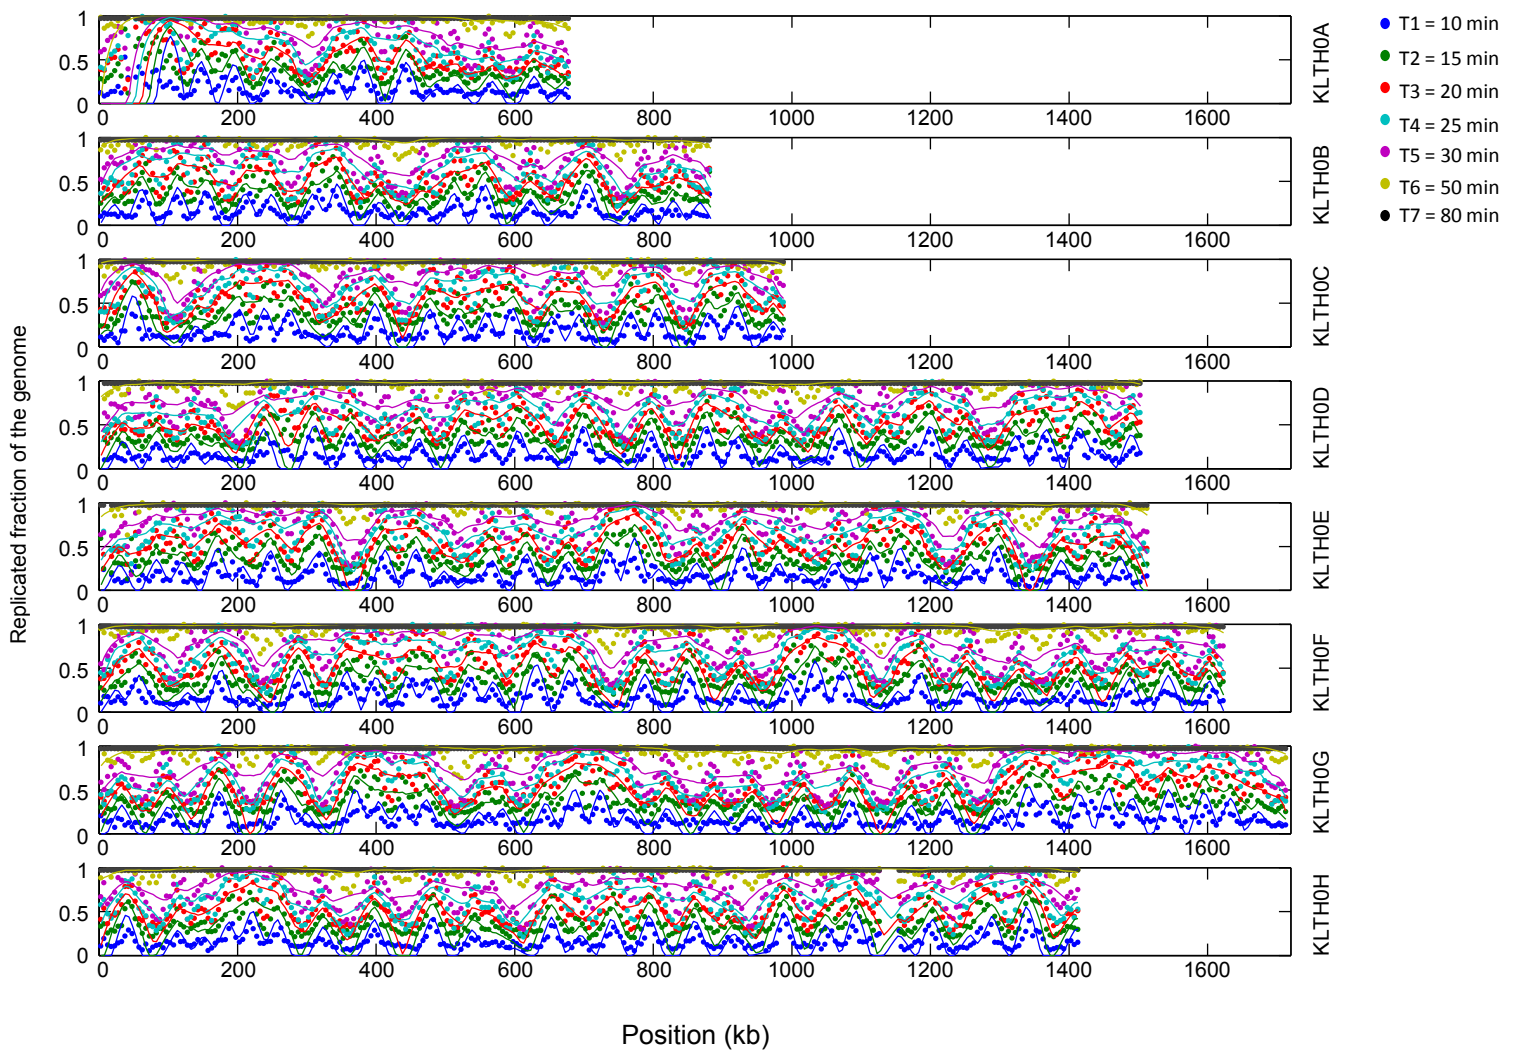

*Lachancea nothofagi*

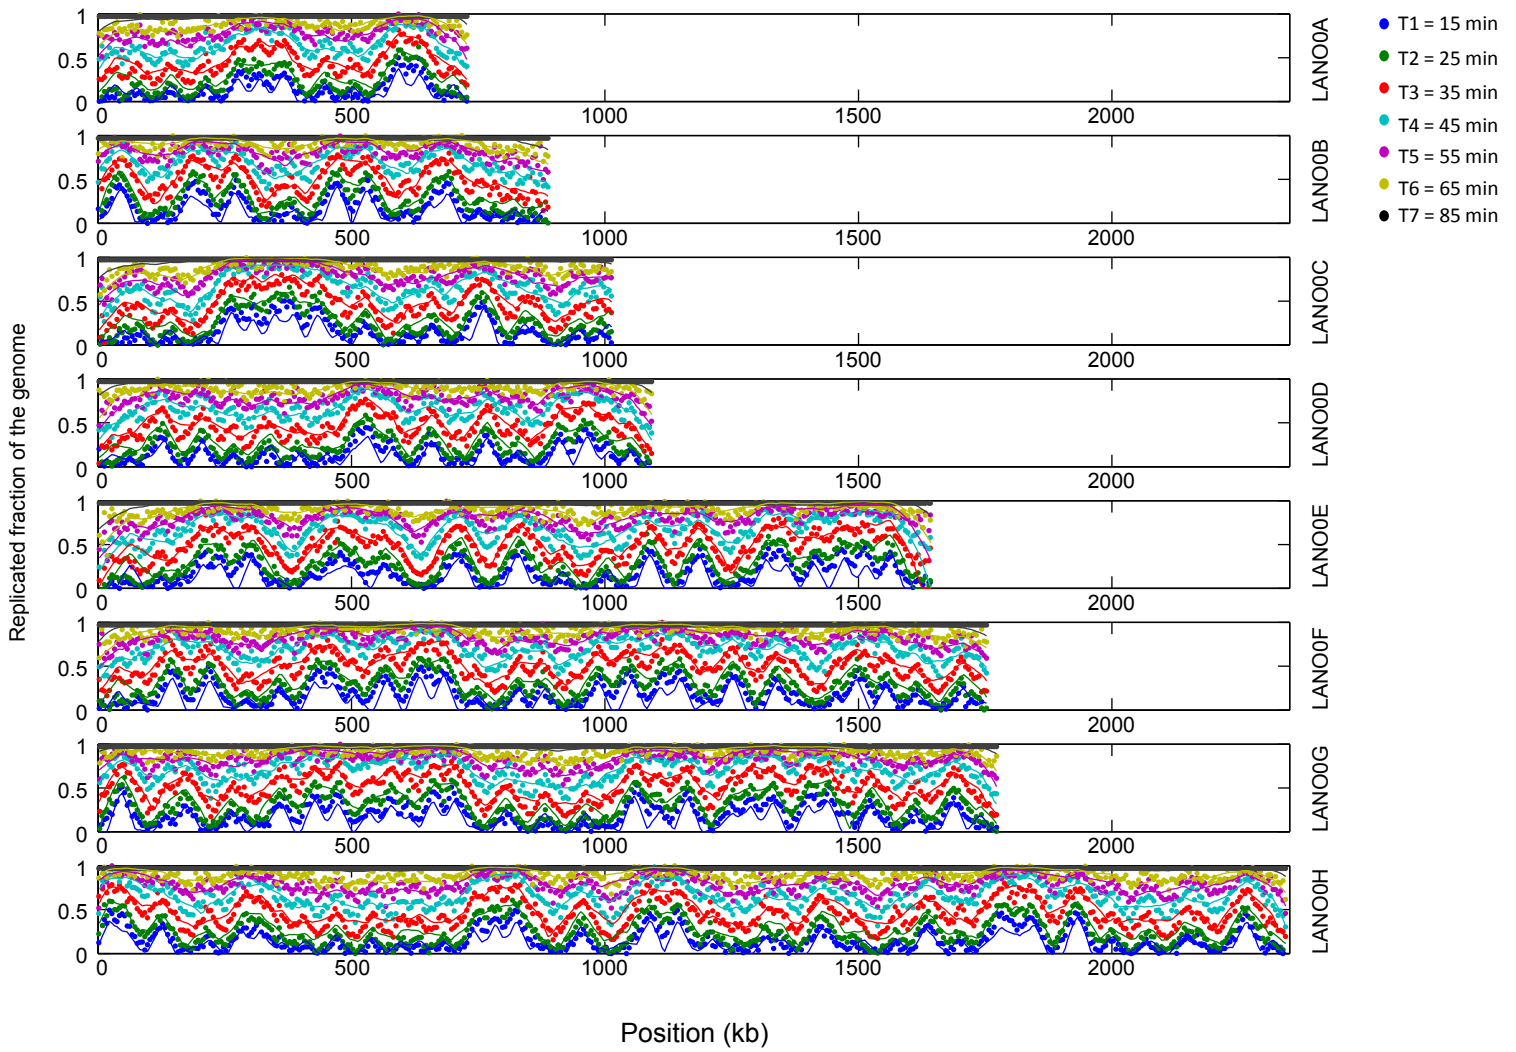

*Lachanea dasiensis*

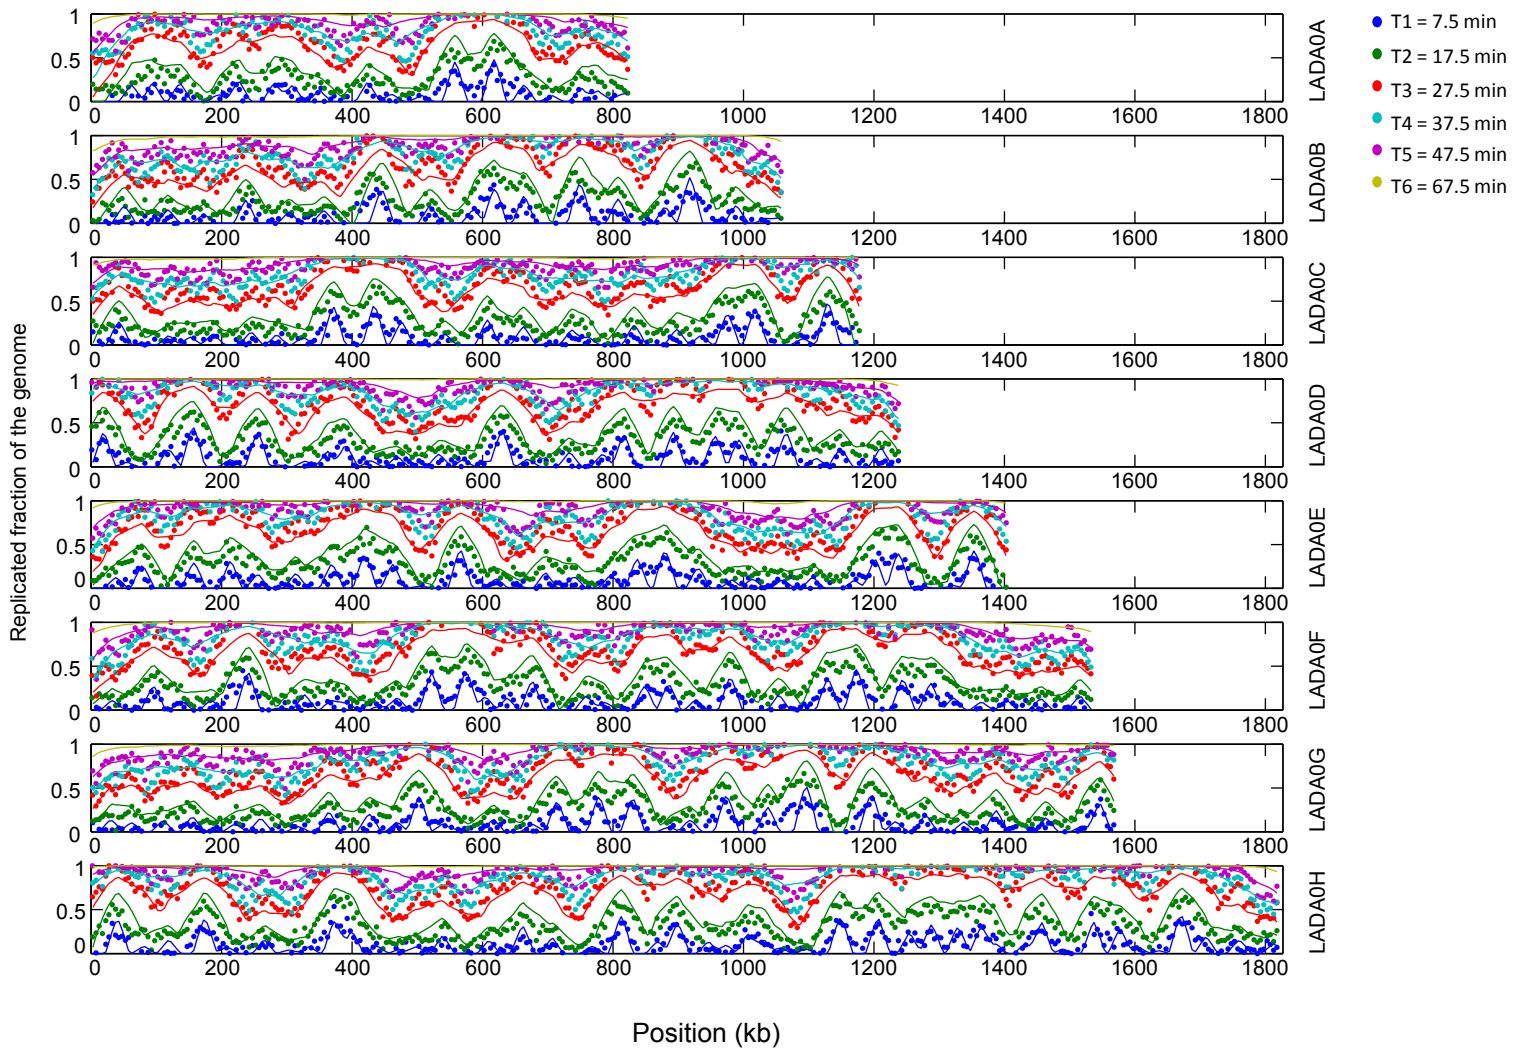

*Lachancea meyersii*

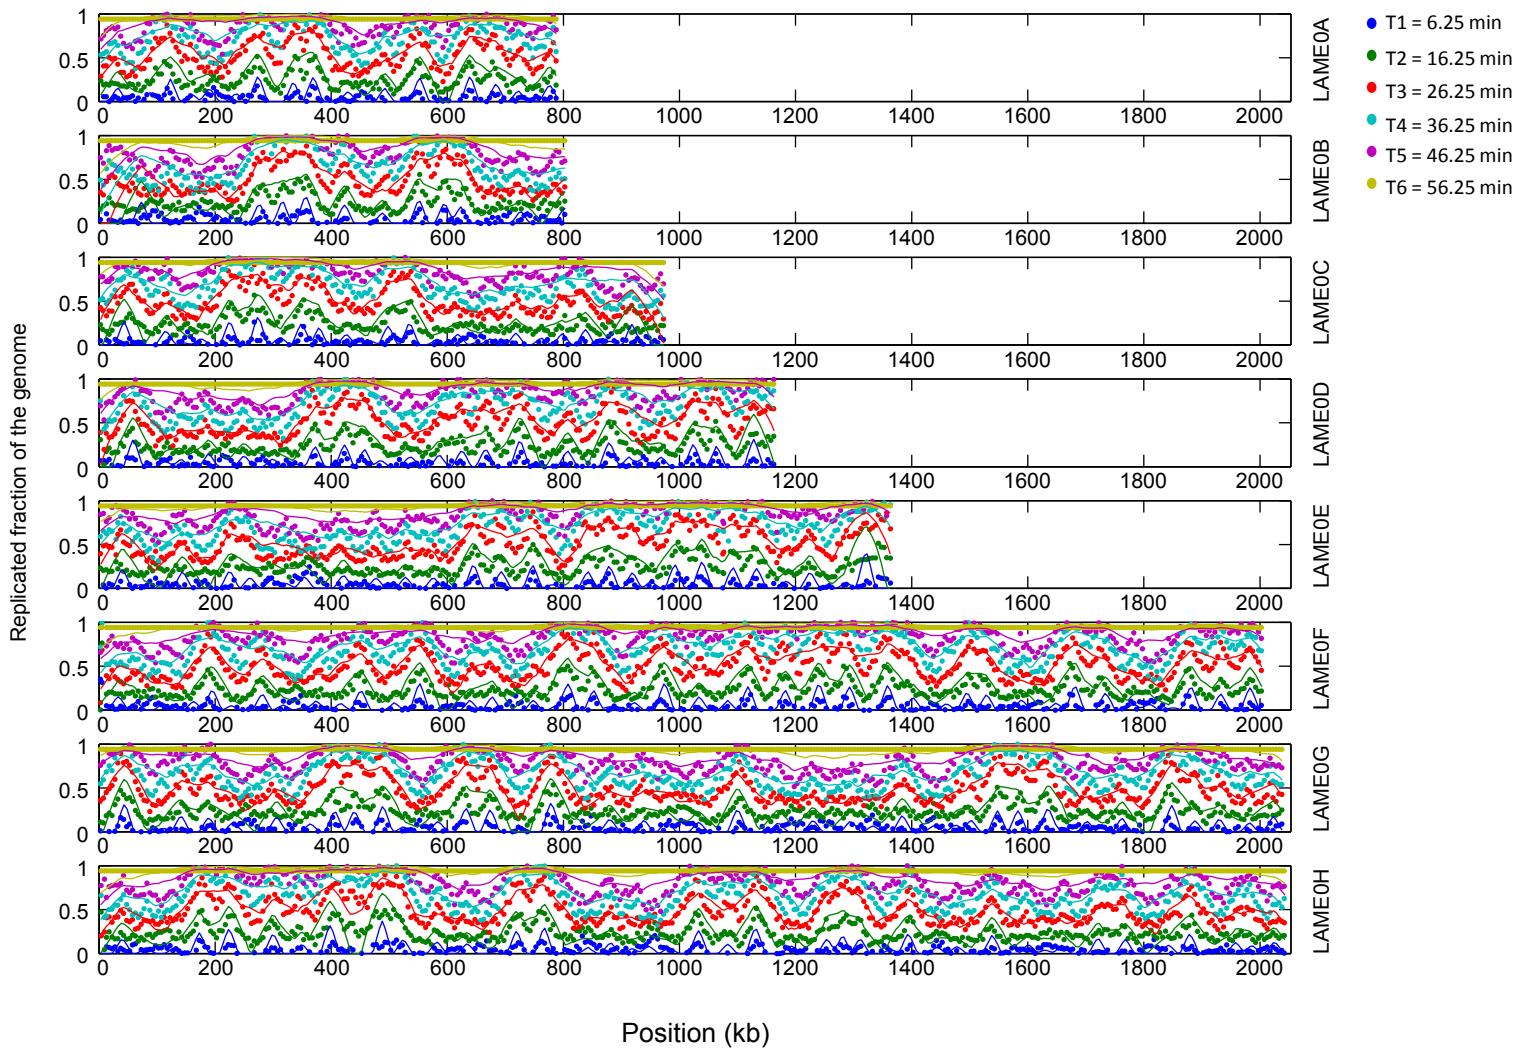

*Lachancea fantastica*

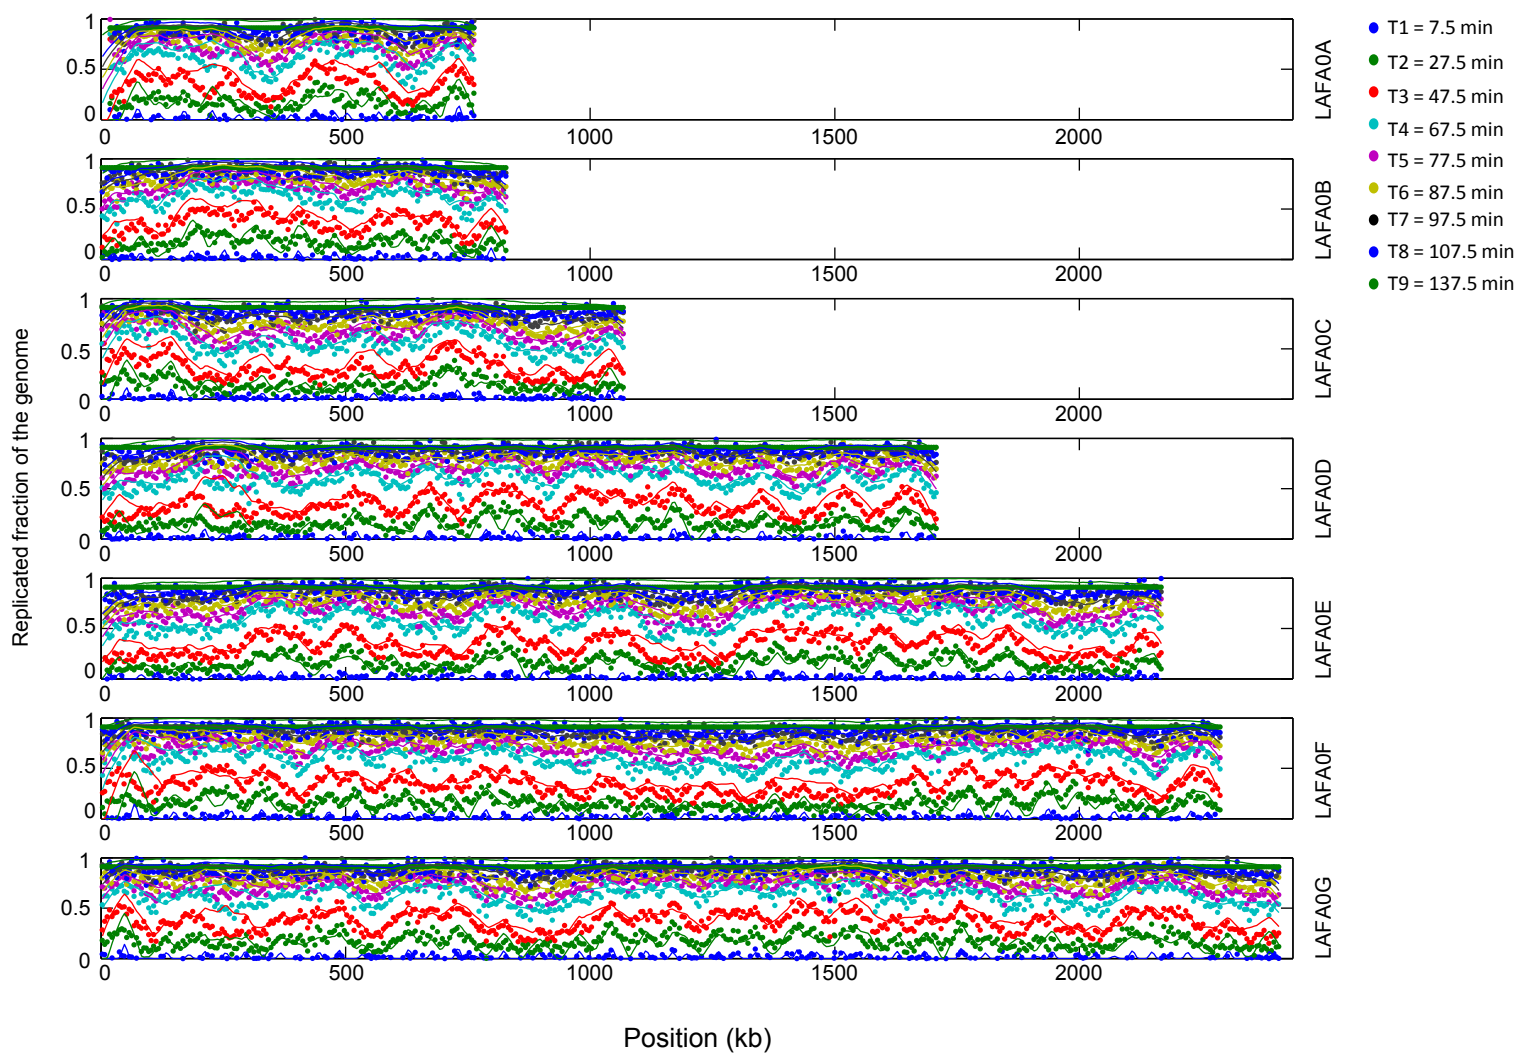



**Supplementary Fig. 19:** Comparison of the experimental replication profiles at all time points with fits of the theoretical model. For every species, empirical data (symbols) and theoretical data (continuous lines of the same color of the symbols) are represented. Both data and model are averaged with a bin of 5Kb. Note that the empirical data were normalized between 0 (Start of the replication) and 1 (all the genome is replicated). Different colors indicate the different sampled time points from the beginning of S-phase.

| Species                  | Strain              | ploidy  | mating type | growth media | growth temperature | Replication assay temperature |
|--------------------------|---------------------|---------|-------------|--------------|--------------------|-------------------------------|
| <i>L. kluyveri</i>       | LAKL001             | haploid | a           | YPD          | 30°C               | 23°C                          |
| <i>L. cidri</i>          | CBS4575             | diploid | a/alpha     | YPD          | 30°C               | 23°C                          |
| <i>L. fermentati</i>     | CBS707              | diploid | a/alpha     | YPD          | 30°C               | 23°C                          |
| <i>L. mirantina</i>      | CBS11717 (CLIB1160) | haploid | -           | YPD          | 30°C               | 23°C                          |
| <i>L. thermotolerans</i> | CBS6340             | diploid | a/alpha     | YPD          | 30°C               | 23°C                          |
| <i>L. waltii</i>         | CBS6430             | diploid | a/alpha     | YPD          | 30°C               | 23°C                          |
| <i>L. nothofagi</i>      | CBS11611            | haploid | -           | YPD          | 24°C               | 23°C                          |
| <i>L. dasiensis</i>      | CBS10888            | haploid | -           | YPD          | 30°C               | 23°C                          |
| <i>L. meyersii</i>       | CBS8951             | haploid | -           | YPD          | 30°C               | 23°C                          |
| <i>L. fantastica</i>     | CBS6924             | haploid | -           | YPD          | 24°C               | 23°C                          |

**Supplementary Table. 1:** Yeast strains and growth conditions.

| fragment ID    | Oligo name   | Sequence (5'->3')                                | Size (bp) | Bording Gene              |
|----------------|--------------|--------------------------------------------------|-----------|---------------------------|
| C1             | Cons1-For    | tccgaagacacaatgactctaggggatcgctgtaactgtggcg      | 2497      | KLTH0F16280g-KLTH0F16324g |
|                | Cons1-Rev    | gtcatgataataatggtttcttaggtcgagccatagcgaacacaa    |           |                           |
| C2             | Cons2-For    | tccgaagacacaatgactctaggggaatgcagggactcccatcg     | 474       | KLTH0G01298g-KLTH0G01320g |
|                | Cons2-Rev    | gtcatgataataatggtttcttaggataatgctaccggcatcgct    |           |                           |
| C3             | Cons3-For    | tccgaagacacaatgactctagggcgctgctccgagataatggca    | 1491      | KLTH0D05126g-KLTH0D05148g |
|                | Cons3-Rev    | gtcatgataataatggtttcttaggtcgccagctccttgttgata    |           |                           |
| C4             | Cons4-For    | tccgaagacacaatgactctaggggtgctgtgctgctctctctg     | 534       | KLTH0A06754g-KLTH0A06776g |
|                | Cons4-Rev    | gtcatgataataatggtttcttagggcagccaggcctaaattcc     |           |                           |
| L1             | Loss1-For    | tccgaagacacaatgactctaggggacgacacacgaagagcag      | 361       | KLTH0C04818g-KLTH0C04840g |
|                | Loss1-Rev    | gtcatgataataatggtttcttaggcaagacagaagccagggtg     |           |                           |
| L2             | Loss2-For    | tccgaagacacaatgactctaggggctcctttgagcataccgt      | 4592      | KLTH0C07590g-KLTH0C07524g |
|                | Loss2-Rev    | gtcatgataataatggtttcttagggagaatacatcctggcagca    |           |                           |
| L3             | Loss3-For    | tccgaagacacaatgactctaggggatgtttttccaactttgac     | 3808      | KLTH0C11748r-KLTH0C11814r |
|                | Loss3-Rev    | gtcatgataataatggtttcttaggattagatacatgtggcgag     |           |                           |
| L4             | Loss4-For    | tccgaagacacaatgactctaggggctggagcagagcaagtc       | 4457      | KLTH0D00550g-KLTH0D00594g |
|                | Loss4-Rev    | gtcatgataataatggtttcttaggcacgaagtccgctcacatc     |           |                           |
| L5             | Loss5-For    | tccgaagacacaatgactctaggggctgagggagctgctaa        | 2090      | KLTH0D05918g-KLTH0D05962g |
|                | Loss5-Rev    | gtcatgataataatggtttcttaggatcatagagcagccactg      |           |                           |
| L6             | Loss6-For    | tccgaagacacaatgactctaggggctgagctttctgcaaatcgt    | 1997      | KLTH0D12254g-KLTH0D12276g |
|                | Loss6-Rev    | gtcatgataataatggtttcttaggaagtcgaatggaaccgact     |           |                           |
| L7             | Loss7-For    | tccgaagacacaatgactctaggggctgagatctattgttgggc     | 518       | KLTH0F11858g-KLTH0F11880g |
|                | Loss7-Rev    | gtcatgataataatggtttcttaggcgctggttttcaaaaga       |           |                           |
| L8             | Loss8-For    | tccgaagacacaatgactctaggggagattggcgtgggcaagat     | 4253      | KLTH0G07018g-KLTH0G06996g |
|                | Loss8-Rev    | gtcatgataataatggtttcttaggtcattcatgtcaaaattctgatc |           |                           |
| L9             | Loss9-For    | tccgaagacacaatgactctaggggccaagaaaagacctgttccc    | 1663      | KLTH0B03234g              |
|                | Loss9-Rev    | gtcatgataataatggtttcttaggatgtgacctcgaaggattc     |           |                           |
| L10            | Loss10-For   | tccgaagacacaatgactctaggggccccatgttggcggatttc     | 4538      | KLTH0F07480g              |
|                | Loss10-Rev   | gtcatgataataatggtttcttaggcttagggaagtgtacgcggc    |           |                           |
| L11            | Loss11-For   | tccgaagacacaatgactctaggggagcttgccttttgcgagaa     | 2000      | KLTH0H14564g-KLTH0H14586g |
|                | Loss11-Rev   | gtcatgataataatggtttcttaggtcccgaacctcggtctct      |           |                           |
| L12            | Loss12-For   | tccgaagacacaatgactctaggggtgtttcttgatcccactgt     | 431       | KLTH0H15290r-KLTH0H15312g |
|                | Loss12-Rev   | gtcatgataataatggtttcttaggcctacaagatgaacgcggc     |           |                           |
| pRS41 backbone | pRS41K-For   | atTTtaataatttgatcagctgatgaccagggtggcacttttcg     | 4665      | -                         |
|                | pRS41K-Rev   | cctaagaaccattattatc                              |           |                           |
| LATH-CenC      | CenC-For     | atcagctgatccaatta                                | 128       | -                         |
|                | CenC-Rev     | attgtgtcttcggaacc                                |           |                           |
| TEST-Centro    | TESTCenC-For | TTCATTCAGCTCCGGTCCC                              | 765       | -                         |
|                | TESTCenC-Rev | GTCTTCGGAACCCATATACAATTT                         |           |                           |
| TEST-ARS       | TESTARS-For  | AGGGTTATTGTCTCATGAGCGG                           | -         | -                         |
|                | TESTARS-Rev  | CAGACAAGCTGTGACCGTCT                             |           |                           |

**Supplementary Table. 2:** Oligonucleotides used to construct the ARS assay plasmids.
